# Supplementary material
Source: PubMed Central journal article supplement (PMC6413271)
Supplement: ajtr0011-0733-f8.pdf [file ajtr0011-0733-f8.pdf]

## CCL2-CCL5/CCR4 and radiation response

**Supplementary Table 1.** Identification of significantly up-regulated genes in irradiated HPAEpiC cells using RNA-seq

| Gene_ID         | Symbol         | log2 Fold Change | P value   |
|-----------------|----------------|------------------|-----------|
| ENSG00000283515 | CTD-3138B18.4  | 6.241            | 0.0477    |
| ENSG00000162692 | VCAM1          | 5.934            | 8.72E-23  |
| ENSG00000213886 | UBD            | 4.904            | 4.32E-11  |
| ENSG00000271503 | CCL5           | 4.850            | 1.65E-120 |
| ENSG00000134321 | RSAD2          | 4.535            | 1.30E-08  |
| ENSG00000131203 | IDO1           | 4.520            | 1.03E-08  |
| ENSG00000152463 | OLAH           | 4.473            | 2.66E-08  |
| ENSG00000257529 | RPL36A-HNRNPH2 | 4.370            | 1.22E-16  |
| ENSG00000160188 | RSPH1          | 4.365            | 8.53E-08  |
| ENSG00000162490 | DRAXIN         | 4.303            | 8.53E-09  |
| ENSG00000224294 | RP3-326I13.1   | 4.271            | 2.95E-09  |
| ENSG00000090512 | FETUB          | 4.270            | 3.31E-07  |
| ENSG00000135114 | OASL           | 3.978            | 4.35E-90  |
| ENSG00000143632 | ACTA1          | 3.892            | 9.86E-07  |
| ENSG00000174343 | CHRNA9         | 3.861            | 7.32E-07  |
| ENSG00000198203 | SULT1C2        | 3.830            | 3.36E-05  |
| ENSG00000136999 | NOV            | 3.795            | 1.87E-06  |
| ENSG00000189058 | APOD           | 3.786            | 4.72E-05  |
| ENSG00000078081 | LAMP3          | 3.746            | 5.82E-05  |
| ENSG00000125735 | TNFSF14        | 3.685            | 5.69E-06  |
| ENSG00000107187 | LHX3           | 3.681            | 9.64E-05  |
| ENSG00000251095 | RP11-115D19.1  | 3.647            | 1.89E-07  |
| ENSG00000231574 | KCCAT211       | 3.642            | 4.81E-05  |
| ENSG00000258590 | NBEAP1         | 3.632            | 2.04E-08  |
| ENSG00000186847 | KRT14          | 3.617            | 0.0001    |
| ENSG00000144452 | ABCA12         | 3.610            | 5.04E-36  |
| ENSG00000111335 | OAS2           | 3.603            | 1.37E-42  |
| ENSG00000255398 | HCAR3          | 3.603            | 0.0002    |
| ENSG00000261150 | EPPK1          | 3.592            | 5.62E-08  |
| ENSG00000162654 | GBP4           | 3.590            | 3.02E-17  |
| ENSG00000168314 | MOBP           | 3.570            | 0.0002    |
| ENSG00000234754 | C1orf140       | 3.559            | 0.0002    |
| ENSG00000117707 | PROX1          | 3.543            | 0.0003    |
| ENSG00000246145 | RRS1-AS1       | 3.535            | 0.0003    |
| ENSG00000227028 | SLC8A1-AS1     | 3.532            | 3.92E-08  |
| ENSG00000260704 | LINC00543      | 3.500            | 0.0004    |
| ENSG00000182676 | PPP1R27        | 3.491            | 0.0003    |
| ENSG00000198573 | SPANXC         | 3.475            | 0.0004    |
| ENSG00000115461 | IGFBP5         | 3.463            | 0.0004    |
| ENSG00000237512 | UNC5B-AS1      | 3.461            | 5.52E-05  |
| ENSG00000120675 | DNAJC15        | 3.456            | 0.0004    |
| ENSG00000262445 | CTD-2545H1.2   | 3.441            | 0.0005    |
| ENSG00000249396 | RP11-1C1.4     | 3.398            | 0.0006    |
| ENSG00000113494 | PRLR           | 3.390            | 0.0001    |
| ENSG00000125538 | IL1B           | 3.374            | 9.73E-07  |
| ENSG00000019186 | CYP24A1        | 3.366            | 5.12E-22  |
| ENSG00000263155 | MYZAP          | 3.345            | 1.93E-06  |

## CCL2-CCL5/CCR4 and radiation response

|                 |                |       |          |
|-----------------|----------------|-------|----------|
| ENSG00000134042 | MRO            | 3.342 | 0.0009   |
| ENSG00000213626 | LBH            | 3.337 | 3.38E-16 |
| ENSG00000183072 | NKX2-5         | 3.335 | 0.0002   |
| ENSG00000128422 | KRT17          | 3.331 | 0.0002   |
| ENSG00000176532 | PRR15          | 3.322 | 3.62E-07 |
| ENSG00000113140 | SPARC          | 3.315 | 8.07E-07 |
| ENSG00000278626 | RP11-467L19.16 | 3.300 | 0.0011   |
| ENSG00000189275 | LINC01164      | 3.296 | 1.10E-06 |
| ENSG00000150551 | LYPD1          | 3.280 | 4.46E-05 |
| ENSG00000133106 | EPST11         | 3.273 | 3.04E-07 |
| ENSG00000065320 | NTN1           | 3.267 | 2.49E-07 |
| ENSG00000278919 | AP006285.2     | 3.257 | 0.0013   |
| ENSG00000047936 | ROS1           | 3.245 | 0.0014   |
| ENSG00000144488 | ESPNL          | 3.237 | 0.0014   |
| ENSG00000259783 | RP11-1006G14.2 | 3.234 | 0.0015   |
| ENSG00000228010 | AC073343.13    | 3.229 | 0.0016   |
| ENSG00000182759 | MAFA           | 3.225 | 0.0009   |
| ENSG00000256612 | CYP2B7P        | 3.221 | 0.0008   |
| ENSG00000168878 | SFTPB          | 3.220 | 0.0058   |
| ENSG00000168685 | IL7R           | 3.207 | 2.90E-15 |
| ENSG00000260807 | RP11-161M6.2   | 3.201 | 0.0018   |
| ENSG00000154451 | GBP5           | 3.200 | 0.0019   |
| ENSG00000163554 | SPTA1          | 3.193 | 0.0019   |
| ENSG00000108342 | CSF3           | 3.190 | 0.0007   |
| ENSG00000234465 | PINLYP         | 3.189 | 0.0019   |
| ENSG00000162511 | LAPTM5         | 3.188 | 4.39E-17 |
| ENSG00000175426 | PCSK1          | 3.181 | 0.0020   |
| ENSG00000178573 | MAF            | 3.180 | 0.0020   |
| ENSG00000100234 | TIMP3          | 3.177 | 0.0016   |
| ENSG00000229056 | AC020571.3     | 3.175 | 0.0011   |
| ENSG00000101203 | COL20A1        | 3.144 | 0.0007   |
| ENSG00000265096 | C1QTNF1-AS1    | 3.132 | 2.28E-05 |
| ENSG00000166257 | SCN3B          | 3.126 | 0.0027   |
| ENSG00000173947 | PIFO           | 3.105 | 0.0029   |
| ENSG00000176040 | TMPRSS7        | 3.102 | 0.0029   |
| ENSG00000189350 | FAM179A        | 3.101 | 0.0028   |
| ENSG00000136531 | SCN2A          | 3.080 | 0.0011   |
| ENSG00000093072 | CECR1          | 3.079 | 4.80E-05 |
| ENSG00000274570 | SPDYE10P       | 3.069 | 0.0031   |
| ENSG00000248587 | GDNF-AS1       | 3.066 | 0.0035   |
| ENSG00000026751 | SLAMF7         | 3.059 | 0.0031   |
| ENSG00000282851 | BISPR          | 3.054 | 0.0038   |
| ENSG00000176746 | MAGEB6         | 3.049 | 0.0039   |
| ENSG00000138622 | HCN4           | 3.048 | 0.0039   |
| ENSG00000135423 | GLS2           | 3.047 | 0.0004   |
| ENSG00000144837 | PLA1A          | 3.044 | 0.0027   |
| ENSG00000254973 | RP11-429J17.7  | 3.024 | 0.0038   |
| ENSG00000165025 | SYK            | 3.014 | 0.0043   |
| ENSG00000170523 | KRT83          | 3.014 | 0.0043   |
| ENSG00000272168 | CASC15         | 2.997 | 0.0005   |

## CCL2-CCL5/CCR4 and radiation response

|                 |                |       |          |
|-----------------|----------------|-------|----------|
| ENSG00000268089 | GABRQ          | 2.981 | 0.0046   |
| ENSG00000130487 | KLHDC7B        | 2.976 | 0.0043   |
| ENSG00000148204 | CRB2           | 2.965 | 0.0055   |
| ENSG00000279296 | RP11-609D21.3  | 2.965 | 0.0056   |
| ENSG00000163017 | ACTG2          | 2.964 | 0.0051   |
| ENSG00000133665 | DYDC2          | 2.964 | 0.0023   |
| ENSG00000276633 | AJ011931.1     | 2.954 | 0.0053   |
| ENSG00000168621 | GDNF           | 2.953 | 9.52E-05 |
| ENSG00000164116 | GUCY1A3        | 2.949 | 0.0049   |
| ENSG00000144671 | SLC22A14       | 2.944 | 0.0054   |
| ENSG00000172738 | TMEM217        | 2.938 | 0.0047   |
| ENSG00000243232 | PCDHAC2        | 2.936 | 0.0004   |
| ENSG00000164849 | GPR146         | 2.934 | 2.63E-12 |
| ENSG00000100867 | DHRS2          | 2.934 | 1.60E-33 |
| ENSG00000146038 | DCDC2          | 2.922 | 4.82E-05 |
| ENSG00000160588 | MPZL3          | 2.909 | 0.0070   |
| ENSG00000170477 | KRT4           | 2.909 | 0.0071   |
| ENSG00000261730 | RP4-668J24.2   | 2.906 | 0.0027   |
| ENSG00000279608 | RP11-182N22.9  | 2.904 | 0.0031   |
| ENSG00000142149 | HUNK           | 2.902 | 0.0063   |
| ENSG00000197046 | SIGLEC15       | 2.894 | 0.0044   |
| ENSG00000137033 | IL33           | 2.889 | 0.0035   |
| ENSG00000188404 | SELL           | 2.884 | 1.91E-08 |
| ENSG00000154864 | PIEZO2         | 2.877 | 0.0037   |
| ENSG00000136514 | RTP4           | 2.877 | 7.79E-05 |
| ENSG00000127252 | HRASLS         | 2.871 | 0.0073   |
| ENSG00000132164 | SLC6A11        | 2.860 | 0.0086   |
| ENSG00000120949 | TNFRSF8        | 2.857 | 0.0137   |
| ENSG00000231453 | LINC01305      | 2.847 | 0.0079   |
| ENSG00000102935 | ZNF423         | 2.838 | 0.0039   |
| ENSG00000007908 | SELE           | 2.832 | 0.0076   |
| ENSG00000138829 | FBN2           | 2.829 | 0.0002   |
| ENSG00000267890 | CTD-2126E3.4   | 2.824 | 0.0095   |
| ENSG00000143217 | NECTIN4        | 2.819 | 1.12E-24 |
| ENSG00000271553 | RP11-274B21.10 | 2.817 | 0.0052   |
| ENSG00000110042 | DTX4           | 2.813 | 1.79E-12 |
| ENSG00000228882 | CICP9          | 2.811 | 0.0090   |
| ENSG00000073282 | TP63           | 2.809 | 0.0172   |
| ENSG00000090339 | ICAM1          | 2.804 | 9.80E-33 |
| ENSG00000161544 | CYGB           | 2.795 | 2.11E-23 |
| ENSG00000082074 | FYB            | 2.783 | 0.0027   |
| ENSG00000166407 | LMO1           | 2.775 | 0.0215   |
| ENSG00000245468 | RP11-367J11.3  | 2.774 | 0.0005   |
| ENSG00000133107 | TRPC4          | 2.771 | 0.0118   |
| ENSG00000143631 | FLG            | 2.768 | 0.0205   |
| ENSG00000223511 | RP13-297E16.4  | 2.765 | 0.0067   |
| ENSG00000187479 | C11orf96       | 2.760 | 0.0006   |
| ENSG00000147689 | FAM83A         | 2.746 | 0.0105   |
| ENSG00000271977 | AC226119.4     | 2.740 | 0.0064   |

## CCL2-CCL5/CCR4 and radiation response

|                 |                |       |          |
|-----------------|----------------|-------|----------|
| ENSG00000106123 | EPHB6          | 2.739 | 0.0137   |
| ENSG00000267251 | AC139100.3     | 2.738 | 0.0077   |
| ENSG00000226965 | AC003088.1     | 2.736 | 0.0003   |
| ENSG00000267454 | ZNF582-AS1     | 2.729 | 0.0004   |
| ENSG00000122641 | INHBA          | 2.723 | 0.0040   |
| ENSG00000282308 | DPRXP3         | 2.723 | 0.0142   |
| ENSG00000130768 | SMPDL3B        | 2.721 | 0.0004   |
| ENSG00000115155 | OTOF           | 2.720 | 0.0109   |
| ENSG00000274322 | RP11-314N13.10 | 2.716 | 0.0010   |
| ENSG00000105246 | EBI3           | 2.703 | 1.06E-26 |
| ENSG00000015520 | NPC1L1         | 2.695 | 0.0142   |
| ENSG00000128594 | LRRC4          | 2.695 | 0.0276   |
| ENSG00000137673 | MMP7           | 2.695 | 9.88E-08 |
| ENSG00000253295 | RP11-779018.1  | 2.694 | 0.0144   |
| ENSG00000136274 | NACAD          | 2.693 | 0.0009   |
| ENSG00000158301 | GPRASP2        | 2.693 | 8.01E-05 |
| ENSG00000189157 | FAM47E         | 2.690 | 0.0010   |
| ENSG00000042832 | TG             | 2.689 | 0.0161   |
| ENSG00000095713 | CRTAC1         | 2.683 | 1.08E-07 |
| ENSG00000223382 | RP5-1125N11.2  | 2.672 | 0.0156   |
| ENSG00000163293 | NIPAL1         | 2.659 | 0.0007   |
| ENSG00000139364 | TMEM132B       | 2.656 | 0.0332   |
| ENSG00000177098 | SCN4B          | 2.653 | 0.0180   |
| ENSG00000167617 | CDC42EP5       | 2.653 | 0.0255   |
| ENSG00000124749 | COL21A1        | 2.647 | 3.41E-06 |
| ENSG00000147614 | ATP6VOD2       | 2.645 | 0.0169   |
| ENSG00000267629 | AC138430.4     | 2.636 | 0.0006   |
| ENSG00000271810 | RP11-426L16.10 | 2.635 | 0.0108   |
| ENSG00000169439 | SDC2           | 2.630 | 0.0088   |
| ENSG00000214381 | LINC00488      | 2.626 | 1.01E-08 |
| ENSG00000173432 | SAA1           | 2.625 | 2.22E-13 |
| ENSG00000260012 | RP11-329J18.4  | 2.621 | 0.0183   |
| ENSG00000224936 | SUCLA2P1       | 2.617 | 0.0167   |
| ENSG00000280326 | RP11-642A1.1   | 2.612 | 0.0195   |
| ENSG00000170961 | HAS2           | 2.608 | 0.0122   |
| ENSG00000268423 | AC011551.3     | 2.605 | 0.0195   |
| ENSG00000283293 | RN7SK          | 2.602 | 0.0127   |
| ENSG00000184867 | ARMCX2         | 2.599 | 0.0128   |
| ENSG00000161643 | SIGLEC16       | 2.599 | 0.0201   |
| ENSG00000166183 | ASPG           | 2.599 | 0.0206   |
| ENSG00000147889 | CDKN2A         | 2.597 | 0.0124   |
| ENSG00000183813 | CCR4           | 2.590 | 0.0138   |
| ENSG00000277406 | CH17-385C13.2  | 2.590 | 0.0222   |
| ENSG00000162438 | CTRC           | 2.586 | 0.0189   |
| ENSG00000186310 | NAP1L3         | 2.586 | 6.49E-08 |
| ENSG00000166707 | ZCCHC18        | 2.585 | 0.0152   |
| ENSG00000230408 | AC007163.6     | 2.585 | 0.0332   |
| ENSG00000184809 | B3GALT5-AS1    | 2.583 | 0.0206   |
| ENSG00000250234 | CTD-2024P10.1  | 2.581 | 0.0226   |

## CCL2-CCL5/CCR4 and radiation response

|                 |               |       |          |
|-----------------|---------------|-------|----------|
| ENSG00000136928 | GABBR2        | 2.581 | 0.0226   |
| ENSG00000226673 | LINC01108     | 2.579 | 0.0213   |
| ENSG00000136275 | C7orf69       | 2.575 | 0.0009   |
| ENSG00000095932 | SMIM24        | 2.572 | 0.0256   |
| ENSG00000161896 | IP6K3         | 2.570 | 4.56E-11 |
| ENSG00000095585 | BLNK          | 2.562 | 0.0137   |
| ENSG00000161958 | FGF11         | 2.561 | 1.91E-08 |
| ENSG00000279455 | RP11-495K9.10 | 2.538 | 0.0185   |
| ENSG00000235770 | LINC00607     | 2.536 | 0.0026   |
| ENSG00000224721 | AC007182.6    | 2.533 | 0.0319   |
| ENSG00000010319 | SEMA3G        | 2.533 | 0.0243   |
| ENSG00000142449 | FBN3          | 2.533 | 0.0243   |
| ENSG00000204335 | SP5           | 2.529 | 0.0273   |
| ENSG00000007062 | PROM1         | 2.529 | 0.0253   |
| ENSG00000103313 | MEFV          | 2.525 | 0.0031   |
| ENSG00000164400 | CSF2          | 2.524 | 2.97E-12 |
| ENSG00000273079 | GRIN2B        | 2.521 | 0.0202   |
| ENSG00000261121 | RP11-496D24.2 | 2.519 | 0.0152   |
| ENSG00000184156 | KCNQ3         | 2.518 | 1.40E-10 |
| ENSG00000260604 | RP1-140K8.5   | 2.510 | 0.0019   |
| ENSG00000277502 | uc_338        | 2.509 | 0.0010   |
| ENSG00000187017 | ESPN          | 2.509 | 0.0095   |
| ENSG00000081277 | PKP1          | 2.507 | 0.0229   |
| ENSG00000153012 | LGI2          | 2.506 | 5.49E-07 |
| ENSG00000183128 | CALHM3        | 2.502 | 0.0040   |
| ENSG00000161270 | NPHS1         | 2.498 | 0.0030   |
| ENSG00000154258 | ABCA9         | 2.496 | 0.0175   |
| ENSG00000276953 | TRBV12-4      | 2.495 | 0.0265   |
| ENSG00000154589 | LY96          | 2.494 | 0.0217   |
| ENSG00000107954 | NEURL1        | 2.491 | 0.0184   |
| ENSG00000283265 | RP11-95M15.3  | 2.491 | 0.0297   |
| ENSG00000272908 | RP11-121A8.1  | 2.489 | 0.0222   |
| ENSG00000258593 | CTD-3051D23.4 | 2.486 | 0.0181   |
| ENSG00000116132 | PRRX1         | 2.484 | 0.0295   |
| ENSG00000227938 | AC104695.4    | 2.481 | 0.0268   |
| ENSG00000127325 | BEST3         | 2.480 | 0.0013   |
| ENSG00000181378 | CFAP65        | 2.478 | 0.0168   |
| ENSG00000152049 | KCNE4         | 2.473 | 0.0305   |
| ENSG00000261644 | RP11-327F22.1 | 2.470 | 0.0307   |
| ENSG00000186047 | DLEU7         | 2.469 | 0.0203   |
| ENSG00000273294 | C1QTNF3-AMACR | 2.466 | 0.0204   |
| ENSG00000137965 | IFI44         | 2.457 | 5.23E-33 |
| ENSG00000128683 | GAD1          | 2.456 | 0.0041   |
| ENSG00000257925 | RP11-493L12.3 | 2.454 | 0.0060   |
| ENSG00000144908 | ALDH1L1       | 2.447 | 0.0306   |
| ENSG00000243478 | AOX2P         | 2.446 | 0.0191   |
| ENSG00000225899 | FRG2B         | 2.443 | 0.0297   |
| ENSG00000272459 | RP11-1277A3.3 | 2.442 | 0.0188   |
| ENSG00000152779 | SLC16A12      | 2.439 | 0.0032   |

## CCL2-CCL5/CCR4 and radiation response

|                 |                   |       |           |
|-----------------|-------------------|-------|-----------|
| ENSG00000171234 | UGT2B7            | 2.438 | 0.0328    |
| ENSG00000235244 | DANT2             | 2.436 | 0.0305    |
| ENSG00000169126 | ARMC4             | 2.436 | 0.0220    |
| ENSG00000109625 | CPZ               | 2.430 | 4.24E-07  |
| ENSG00000130477 | UNC13A            | 2.430 | 3.75E-23  |
| ENSG00000125730 | C3                | 2.428 | 1.68E-145 |
| ENSG00000188897 | CTD-3088G3.8      | 2.425 | 2.05E-06  |
| ENSG00000266913 | CTC-548K16.2      | 2.425 | 0.0213    |
| ENSG00000183831 | ANKRD45           | 2.417 | 0.0307    |
| ENSG00000229278 | RP11-483F11.7     | 2.417 | 0.0327    |
| ENSG00000012779 | ALOX5             | 2.417 | 0.0451    |
| ENSG00000152229 | PSTPIP2           | 2.415 | 2.20E-28  |
| ENSG00000137975 | CLCA2             | 2.414 | 0.0247    |
| ENSG00000223638 | RFPL4A            | 2.412 | 0.0331    |
| ENSG00000272273 | XXbac-BPG252P9.10 | 2.411 | 0.0336    |
| ENSG00000185640 | KRT79             | 2.407 | 0.0375    |
| ENSG00000158473 | CD1D              | 2.406 | 0.0377    |
| ENSG00000187608 | ISG15             | 2.399 | 3.77E-63  |
| ENSG00000134853 | PDGFRA            | 2.395 | 0.0121    |
| ENSG00000223949 | ROR1-AS1          | 2.394 | 0.0327    |
| ENSG00000178462 | TUBAL3            | 2.393 | 0.0329    |
| ENSG00000196562 | SULF2             | 2.392 | 1.04E-47  |
| ENSG00000158258 | CLSTN2            | 2.391 | 0.0043    |
| ENSG00000272159 | RP11-350N15.6     | 2.389 | 0.0197    |
| ENSG00000251665 | RP11-700H6.2      | 2.388 | 0.0379    |
| ENSG00000272551 | RP11-324L17.1     | 2.387 | 0.0263    |
| ENSG00000257767 | RP11-162P23.2     | 2.387 | 0.0256    |
| ENSG00000222000 | AC092675.3        | 2.385 | 0.0388    |
| ENSG00000183067 | IGSF5             | 2.385 | 0.0388    |
| ENSG00000263823 | RP11-326K13.4     | 2.383 | 0.0063    |
| ENSG00000197915 | HRNR              | 2.374 | 0.0145    |
| ENSG00000138615 | CILP              | 2.370 | 0.0050    |
| ENSG00000187288 | CIDEC             | 2.366 | 0.0247    |
| ENSG00000205978 | NYNRIN            | 2.365 | 7.86E-07  |
| ENSG00000174611 | KY                | 2.360 | 0.0375    |
| ENSG00000170703 | TTLL6             | 2.359 | 1.51E-05  |
| ENSG00000011590 | ZBTB32            | 2.357 | 0.0122    |
| ENSG00000258952 | SALRNA1           | 2.357 | 0.0438    |
| ENSG00000144481 | TRPM8             | 2.356 | 0.0081    |
| ENSG00000259627 | RP11-244F12.2     | 2.355 | 0.0445    |
| ENSG00000187848 | P2RX2             | 2.353 | 0.0394    |
| ENSG00000120278 | PLEKHG1           | 2.351 | 2.65E-08  |
| ENSG00000260777 | CTD-2008P7.1      | 2.344 | 3.04E-07  |
| ENSG00000253347 | CTD-2026D20.2     | 2.344 | 0.0396    |
| ENSG00000250893 | RP11-588L15.2     | 2.342 | 0.0403    |
| ENSG00000266978 | CTD-2369P2.5      | 2.340 | 0.0420    |
| ENSG00000180644 | PRF1              | 2.339 | 0.0447    |
| ENSG00000121858 | TNFSF10           | 2.338 | 0.0057    |
| ENSG00000169429 | CXCL8             | 2.335 | 4.67E-70  |

## CCL2-CCL5/CCR4 and radiation response

|                 |                  |       |          |
|-----------------|------------------|-------|----------|
| ENSG00000162676 | GFI1             | 2.334 | 0.0060   |
| ENSG00000077522 | ACTN2            | 2.333 | 0.0463   |
| ENSG00000007350 | TKTL1            | 2.333 | 0.0463   |
| ENSG00000254980 | RP11-794P6.6     | 2.322 | 0.0473   |
| ENSG00000273139 | XXbac-B444P24.14 | 2.320 | 0.0329   |
| ENSG00000187994 | RINL             | 2.320 | 4.57E-12 |
| ENSG00000133256 | PDE6B            | 2.319 | 0.0474   |
| ENSG00000136918 | WDR38            | 2.318 | 0.0356   |
| ENSG00000134627 | PIWIL4           | 2.317 | 0.0435   |
| ENSG00000237975 | FLG-AS1          | 2.314 | 0.0260   |
| ENSG00000113212 | PCDHB7           | 2.314 | 0.0356   |
| ENSG00000253102 | RP1-117B12.4     | 2.313 | 0.0328   |
| ENSG00000169432 | SCN9A            | 2.305 | 0.0441   |
| ENSG00000224897 | POT1-AS1         | 2.305 | 0.0358   |
| ENSG00000132915 | PDE6A            | 2.302 | 1.40E-05 |
| ENSG00000270000 | RP3-449M8.9      | 2.299 | 0.0448   |
| ENSG00000260643 | RP11-303E16.8    | 2.299 | 0.0017   |
| ENSG00000119283 | TRIM67           | 2.295 | 8.67E-28 |
| ENSG00000268738 | HSFX2            | 2.295 | 0.0323   |
| ENSG00000119917 | IFIT3            | 2.294 | 1.03E-68 |
| ENSG00000154262 | ABCA6            | 2.285 | 0.0471   |
| ENSG00000241489 | AF011889.5       | 2.280 | 3.49E-12 |
| ENSG00000120156 | TEK              | 2.280 | 0.0100   |
| ENSG00000116183 | PAPPA2           | 2.279 | 0.0076   |
| ENSG00000101276 | SLC52A3          | 2.275 | 0.0489   |
| ENSG00000175229 | GAL3ST3          | 2.274 | 0.0497   |
| ENSG00000198576 | ARC              | 2.272 | 8.38E-05 |
| ENSG00000221381 | SNORD88B         | 2.266 | 0.0034   |
| ENSG00000147485 | PXDNL            | 2.260 | 0.0131   |
| ENSG00000233198 | RNF224           | 2.259 | 0.0154   |
| ENSG00000179362 | HMGN2P46         | 2.259 | 0.0077   |
| ENSG00000185933 | CALHM1           | 2.258 | 0.0363   |
| ENSG00000137959 | IFI44L           | 2.257 | 0.0007   |
| ENSG00000204967 | PCDHA4           | 2.250 | 4.58E-10 |
| ENSG00000198788 | MUC2             | 2.247 | 0.0014   |
| ENSG00000145708 | CRHBP            | 2.246 | 0.0383   |
| ENSG00000232709 | MARK2P9          | 2.245 | 0.0099   |
| ENSG00000257894 | RP1-78014.1      | 2.241 | 0.0179   |
| ENSG00000233554 | B4GALT1-AS1      | 2.240 | 0.0097   |
| ENSG00000021645 | NRXN3            | 2.240 | 0.0011   |
| ENSG00000254143 | RP11-470M17.2    | 2.238 | 0.0457   |
| ENSG00000120324 | PCDHB10          | 2.238 | 0.0154   |
| ENSG00000185338 | SOCS1            | 2.233 | 0.0279   |
| ENSG00000260454 | RP11-367F23.2    | 2.222 | 0.0407   |
| ENSG00000260784 | AC026150.6       | 2.219 | 0.0079   |
| ENSG00000163739 | CXCL1            | 2.215 | 2.17E-37 |
| ENSG00000066056 | TIE1             | 2.212 | 0.0285   |
| ENSG00000164342 | TLR3             | 2.209 | 2.43E-13 |
| ENSG00000185924 | RTN4RL1          | 2.204 | 8.71E-33 |

## CCL2-CCL5/CCR4 and radiation response

|                 |                |       |          |
|-----------------|----------------|-------|----------|
| ENSG00000138271 | GPR87          | 2.203 | 0.0454   |
| ENSG00000189431 | RASSF10        | 2.202 | 1.44E-12 |
| ENSG00000151067 | CACNA1C        | 2.200 | 0.0418   |
| ENSG00000130303 | BST2           | 2.197 | 0.0214   |
| ENSG00000116701 | NCF2           | 2.197 | 4.01E-12 |
| ENSG00000232471 | RP11-241F15.7  | 2.189 | 0.0129   |
| ENSG00000147606 | SLC26A7        | 2.188 | 0.0237   |
| ENSG00000283201 | RP11-15H20.8   | 2.188 | 0.0010   |
| ENSG00000132274 | TRIM22         | 2.185 | 7.37E-40 |
| ENSG00000277586 | NEFL           | 2.185 | 7.45E-27 |
| ENSG00000228021 | RP11-383C5.3   | 2.182 | 0.0031   |
| ENSG00000079385 | CEACAM1        | 2.181 | 5.42E-11 |
| ENSG00000165376 | CLDN2          | 2.180 | 1.81E-19 |
| ENSG00000123342 | MMP19          | 2.174 | 5.74E-12 |
| ENSG00000183690 | EFHC2          | 2.173 | 0.0195   |
| ENSG00000171345 | KRT19          | 2.172 | 0.0491   |
| ENSG00000185742 | C11orf87       | 2.171 | 0.0207   |
| ENSG00000263050 | RP11-667K14.3  | 2.170 | 0.0392   |
| ENSG00000019169 | MARCO          | 2.169 | 0.0008   |
| ENSG00000136378 | ADAMTS7        | 2.168 | 5.42E-44 |
| ENSG00000042062 | FAM65C         | 2.162 | 0.0144   |
| ENSG00000259342 | RP11-519G16.5  | 2.148 | 0.0223   |
| ENSG00000128510 | CPA4           | 2.146 | 1.33E-75 |
| ENSG00000158270 | COLEC12        | 2.144 | 7.31E-07 |
| ENSG00000107731 | UNC5B          | 2.138 | 0.0038   |
| ENSG00000234444 | ZNF736         | 2.137 | 0.0199   |
| ENSG00000104848 | KCNA7          | 2.130 | 0.0312   |
| ENSG00000049249 | TNFRSF9        | 2.128 | 1.04E-20 |
| ENSG00000272896 | RP11-216L13.17 | 2.124 | 0.0499   |
| ENSG00000271447 | MMP28          | 2.123 | 0.0003   |
| ENSG00000173557 | C2orf70        | 2.122 | 0.0208   |
| ENSG00000085117 | CD82           | 2.120 | 1.72E-56 |
| ENSG00000273983 | HIST1H3G       | 2.117 | 0.0009   |
| ENSG00000064300 | NGFR           | 2.113 | 5.77E-07 |
| ENSG00000240219 | RP11-430C7.5   | 2.111 | 2.92E-07 |
| ENSG00000119922 | IFIT2          | 2.110 | 1.39E-60 |
| ENSG00000259828 | RP11-63E9.1    | 2.108 | 0.0221   |
| ENSG00000248360 | LINC00504      | 2.102 | 0.0224   |
| ENSG00000135373 | EHF            | 2.096 | 0.0167   |
| ENSG00000228146 | CASP16P        | 2.090 | 0.0239   |
| ENSG00000162643 | WDR63          | 2.084 | 1.79E-12 |
| ENSG00000144852 | NR1I2          | 2.077 | 0.0241   |
| ENSG00000261744 | RP11-21B21.4   | 2.074 | 0.0254   |
| ENSG00000109072 | VTN            | 2.067 | 1.17E-05 |
| ENSG00000108691 | CCL2           | 2.057 | 6.42E-16 |
| ENSG00000226472 | RP11-551L14.4  | 2.056 | 0.0026   |
| ENSG00000135517 | MIP            | 2.052 | 0.0340   |
| ENSG00000134339 | SAA2           | 2.047 | 0.0250   |
| ENSG00000244649 | CTD-2377D24.6  | 2.042 | 0.0326   |



## CCL2-CCL5/CCR4 and radiation response

|                 |                |       |          |
|-----------------|----------------|-------|----------|
| ENSG00000246228 | CASC8          | 2.042 | 0.0372   |
| ENSG00000283233 | AL034550.1     | 2.038 | 0.0019   |
| ENSG00000237945 | LINC00649      | 2.036 | 0.0449   |
| ENSG00000157782 | CABP1          | 2.030 | 0.0260   |
| ENSG00000100346 | CACNA1I        | 2.027 | 0.0310   |
| ENSG00000260136 | CTD-2270L9.4   | 2.024 | 2.43E-10 |
| ENSG00000228363 | AC015971.2     | 2.021 | 0.0009   |
| ENSG00000141338 | ABCA8          | 2.014 | 0.0449   |
| ENSG00000255974 | CYP2A6         | 2.012 | 0.0034   |
| ENSG00000137699 | TRIM29         | 2.008 | 0.0322   |
| ENSG00000132517 | SLC52A1        | 2.007 | 6.84E-13 |
| ENSG00000178947 | SMIM10L2A      | 2.003 | 1.40E-10 |
| ENSG00000140279 | DUOX2          | 2.002 | 0.0380   |
| ENSG00000230495 | RP11-462D18.2  | 1.998 | 0.0389   |
| ENSG00000254783 | RP11-320L11.2  | 1.990 | 0.0420   |
| ENSG00000138449 | SLC40A1        | 1.988 | 6.11E-33 |
| ENSG00000145029 | NICN1          | 1.988 | 5.41E-06 |
| ENSG00000150687 | PRSS23         | 1.987 | 0.0006   |
| ENSG00000215481 | BCRP3          | 1.985 | 0.0011   |
| ENSG00000105509 | HAS1           | 1.981 | 1.46E-05 |
| ENSG00000251615 | RP11-77403.3   | 1.980 | 0.0004   |
| ENSG00000110169 | HPX            | 1.975 | 6.27E-06 |
| ENSG00000239670 | RP4-803A2.2    | 1.972 | 0.0364   |
| ENSG00000128340 | RAC2           | 1.970 | 0.0381   |
| ENSG00000178033 | FAM26E         | 1.970 | 2.12E-05 |
| ENSG00000131737 | KRT34          | 1.963 | 0.0347   |
| ENSG00000164379 | FOXQ1          | 1.959 | 0.0358   |
| ENSG00000100100 | PIK3IP1        | 1.958 | 1.97E-27 |
| ENSG00000159450 | TCHH           | 1.957 | 0.0003   |
| ENSG00000182175 | RGMA           | 1.953 | 0.0421   |
| ENSG00000204947 | ZNF425         | 1.950 | 1.60E-12 |
| ENSG00000091583 | APOH           | 1.949 | 1.68E-05 |
| ENSG00000100033 | PRODH          | 1.949 | 0.0007   |
| ENSG00000248671 | ALG1L9P        | 1.948 | 0.0123   |
| ENSG00000182704 | TSKU           | 1.946 | 0.0428   |
| ENSG00000205426 | KRT81          | 1.942 | 8.78E-41 |
| ENSG00000237961 | RP11-1281K21.1 | 1.942 | 2.49E-08 |
| ENSG00000182329 | KIAA2012       | 1.939 | 0.0459   |
| ENSG00000145002 | FAM86B2        | 1.937 | 0.0472   |
| ENSG00000161328 | LRRC56         | 1.929 | 2.74E-05 |
| ENSG00000236098 | RP11-148B18.4  | 1.920 | 0.0403   |
| ENSG00000197191 | CYSRT1         | 1.918 | 7.70E-14 |
| ENSG00000133321 | RARRES3        | 1.915 | 2.29E-10 |
| ENSG00000169085 | C8orf46        | 1.914 | 1.14E-05 |
| ENSG00000168824 | NSG1           | 1.899 | 1.46E-06 |
| ENSG00000167703 | SLC43A2        | 1.895 | 3.93E-29 |
| ENSG00000169435 | RASSF6         | 1.895 | 0.0356   |
| ENSG00000119630 | PGF            | 1.885 | 7.95E-12 |
| ENSG00000185904 | LINC00839      | 1.882 | 0.0386   |

## CCL2-CCL5/CCR4 and radiation response

|                 |               |       |          |
|-----------------|---------------|-------|----------|
| ENSG00000225950 | NTF4          | 1.878 | 0.0106   |
| ENSG00000173918 | C1QTNF1       | 1.870 | 7.32E-75 |
| ENSG00000123610 | TNFAIP6       | 1.857 | 0.0499   |
| ENSG00000166145 | SPINT1        | 1.855 | 6.32E-10 |
| ENSG00000117228 | GBP1          | 1.850 | 6.05E-19 |
| ENSG00000183114 | FAM43B        | 1.848 | 0.0011   |
| ENSG00000167100 | SAMD14        | 1.845 | 0.0003   |
| ENSG00000176907 | C8orf4        | 1.842 | 6.32E-30 |
| ENSG00000144182 | LIPT1         | 1.840 | 1.31E-11 |
| ENSG00000267469 | AC005944.2    | 1.839 | 0.0068   |
| ENSG00000272597 | RP11-446H18.6 | 1.834 | 0.0177   |
| ENSG00000283020 | DUX4L37       | 1.833 | 0.0335   |
| ENSG00000113211 | PCDHB6        | 1.832 | 0.0002   |
| ENSG00000240970 | RPL23AP64     | 1.826 | 0.0142   |
| ENSG00000180155 | LYNX1         | 1.816 | 1.42E-18 |
| ENSG00000171444 | MCC           | 1.814 | 7.84E-17 |
| ENSG00000100302 | RASD2         | 1.805 | 6.90E-10 |
| ENSG00000182568 | SATB1         | 1.798 | 0.0026   |
| ENSG00000136114 | THSD1         | 1.797 | 1.21E-53 |
| ENSG00000134762 | DSC3          | 1.780 | 8.84E-33 |
| ENSG00000163453 | IGFBP7        | 1.779 | 1.41E-36 |
| ENSG00000279718 | SNX18P12      | 1.778 | 7.78E-22 |
| ENSG00000134326 | CMPK2         | 1.777 | 0.0001   |
| ENSG00000026103 | FAS           | 1.772 | 1.60E-07 |
| ENSG00000153294 | ADGRF4        | 1.772 | 1.55E-36 |
| ENSG00000187944 | C2orf66       | 1.770 | 1.27E-05 |
| ENSG00000170369 | CST2          | 1.768 | 1.87E-08 |
| ENSG00000137460 | FHDC1         | 1.766 | 2.54E-10 |
| ENSG00000163071 | SPATA18       | 1.766 | 8.80E-30 |
| ENSG00000168918 | INPP5D        | 1.765 | 2.49E-07 |
| ENSG00000067445 | TRO           | 1.764 | 5.06E-06 |
| ENSG00000107282 | APBA1         | 1.755 | 0.0010   |
| ENSG00000120057 | SFRP5         | 1.752 | 0.0094   |
| ENSG00000172748 | ZNF596        | 1.746 | 9.43E-05 |
| ENSG00000127129 | EDN2          | 1.744 | 0.0030   |
| ENSG00000138131 | LOXL4         | 1.744 | 6.32E-18 |
| ENSG00000168490 | PHYHIP        | 1.741 | 0.0013   |
| ENSG00000158023 | WDR66         | 1.741 | 3.13E-10 |
| ENSG00000183778 | B3GALT5       | 1.741 | 0.0103   |
| ENSG00000057704 | TMCC3         | 1.733 | 0.0009   |
| ENSG00000162415 | ZSWIM5        | 1.732 | 1.38E-05 |
| ENSG00000235142 | RP1-60019.1   | 1.728 | 0.0002   |
| ENSG00000100985 | MMP9          | 1.727 | 0.0010   |
| ENSG00000006283 | CACNA1G       | 1.725 | 3.11E-29 |
| ENSG00000107485 | GATA3         | 1.722 | 1.14E-10 |
| ENSG00000164938 | TP53INP1      | 1.721 | 3.17E-38 |
| ENSG00000101335 | MYL9          | 1.720 | 7.72E-26 |
| ENSG00000279204 | RP11-175K6.2  | 1.716 | 0.0008   |
| ENSG00000158683 | PKD1L1        | 1.712 | 0.0009   |

## CCL2-CCL5/CCR4 and radiation response

|                 |                |       |          |
|-----------------|----------------|-------|----------|
| ENSG00000167992 | VWCE           | 1.706 | 4.28E-09 |
| ENSG00000226674 | TEX41          | 1.706 | 7.55E-05 |
| ENSG00000279208 | bP-21264C1.1   | 1.705 | 3.07E-19 |
| ENSG00000104951 | IL4I1          | 1.703 | 0.0314   |
| ENSG00000177076 | ACER2          | 1.700 | 2.10E-10 |
| ENSG00000147573 | TRIM55         | 1.700 | 0.0117   |
| ENSG00000140839 | CLEC18B        | 1.697 | 0.0072   |
| ENSG00000160161 | CILP2          | 1.688 | 0.0035   |
| ENSG00000121552 | CSTA           | 1.687 | 0.0019   |
| ENSG00000183160 | TMEM119        | 1.687 | 0.0068   |
| ENSG00000169247 | SH3TC2         | 1.684 | 8.86E-05 |
| ENSG00000179292 | TMEM151A       | 1.683 | 0.0002   |
| ENSG00000215018 | COL28A1        | 1.681 | 9.41E-05 |
| ENSG00000130700 | GATA5          | 1.681 | 0.0007   |
| ENSG00000174125 | TLR1           | 1.680 | 4.60E-11 |
| ENSG00000128262 | POM121L9P      | 1.676 | 0.0002   |
| ENSG00000278590 | RN7SL113P      | 1.675 | 0.0233   |
| ENSG00000079931 | MOXD1          | 1.674 | 3.89E-07 |
| ENSG00000109846 | CRYAB          | 1.671 | 0.0031   |
| ENSG00000187699 | C2orf88        | 1.666 | 0.0102   |
| ENSG00000226535 | RP11-417L14.1  | 1.664 | 0.0120   |
| ENSG00000155629 | PIK3AP1        | 1.662 | 0.0009   |
| ENSG00000185728 | YTHDF3         | 1.661 | 8.20E-37 |
| ENSG00000230280 | HNRNPA1P59     | 1.657 | 0.0067   |
| ENSG00000115129 | TP53I3         | 1.654 | 2.90E-73 |
| ENSG00000157601 | MX1            | 1.650 | 3.46E-13 |
| ENSG00000100767 | PAPLN          | 1.644 | 3.85E-21 |
| ENSG00000275294 | RP11-428018.6  | 1.640 | 0.0307   |
| ENSG00000065325 | GLP2R          | 1.639 | 2.24E-32 |
| ENSG00000150510 | FAM124A        | 1.631 | 2.94E-08 |
| ENSG00000248583 | RP11-241F15.1  | 1.629 | 1.39E-11 |
| ENSG00000106025 | TSPAN12        | 1.629 | 0.0173   |
| ENSG00000007264 | MATK           | 1.628 | 5.61E-07 |
| ENSG00000100298 | APOBEC3H       | 1.624 | 8.91E-10 |
| ENSG00000136367 | ZFHX2          | 1.620 | 2.47E-11 |
| ENSG00000249962 | RP11-80H5.5    | 1.618 | 0.0475   |
| ENSG00000165917 | RAPSN          | 1.616 | 0.0116   |
| ENSG00000164112 | TMEM155        | 1.613 | 0.0078   |
| ENSG00000128284 | APOL3          | 1.612 | 2.79E-09 |
| ENSG00000173805 | HAP1           | 1.609 | 9.85E-07 |
| ENSG00000250753 | RP11-241F15.10 | 1.607 | 0.0119   |
| ENSG00000244122 | UGT1A7         | 1.607 | 9.05E-05 |
| ENSG00000137868 | STRA6          | 1.606 | 1.14E-12 |
| ENSG00000152433 | ZNF547         | 1.604 | 0.0100   |
| ENSG00000149212 | SESN3          | 1.602 | 0.0018   |
| ENSG00000256124 | LINC01152      | 1.602 | 0.0016   |
| ENSG00000244694 | PTCHD4         | 1.601 | 1.53E-05 |
| ENSG00000165029 | ABCA1          | 1.600 | 4.87E-68 |
| ENSG00000073756 | PTGS2          | 1.600 | 8.35E-14 |

## CCL2-CCL5/CCR4 and radiation response

|                 |               |       |          |
|-----------------|---------------|-------|----------|
| ENSG00000135929 | CYP27A1       | 1.591 | 0.0063   |
| ENSG00000168874 | ATOH8         | 1.588 | 3.88E-07 |
| ENSG00000260912 | RP11-363E7.4  | 1.585 | 1.02E-11 |
| ENSG00000135525 | MAP7          | 1.583 | 1.90E-12 |
| ENSG00000144596 | GRIP2         | 1.583 | 0.0244   |
| ENSG00000187372 | PCDHB13       | 1.580 | 0.0094   |
| ENSG00000134668 | SPOCD1        | 1.578 | 7.64E-17 |
| ENSG00000280138 | RP11-463012.5 | 1.578 | 5.74E-11 |
| ENSG00000132970 | WASF3         | 1.574 | 0.0041   |
| ENSG00000100557 | C14orf105     | 1.571 | 0.0025   |
| ENSG00000174567 | GOLT1A        | 1.571 | 0.0001   |
| ENSG00000222009 | BTBD19        | 1.570 | 0.0041   |
| ENSG00000185745 | IFIT1         | 1.567 | 4.34E-24 |
| ENSG00000151892 | GFRA1         | 1.566 | 6.78E-08 |
| ENSG00000183423 | LRIT3         | 1.566 | 0.0214   |
| ENSG00000099994 | SUSD2         | 1.559 | 6.84E-08 |
| ENSG00000150540 | HNMT          | 1.558 | 1.74E-06 |
| ENSG00000111344 | RASAL1        | 1.555 | 0.0092   |
| ENSG00000164695 | CHMP4C        | 1.554 | 4.03E-06 |
| ENSG00000140557 | ST8SIA2       | 1.553 | 0.0141   |
| ENSG00000215009 | ACSM4         | 1.553 | 0.0270   |
| ENSG00000197852 | FAM212B       | 1.552 | 2.66E-11 |
| ENSG00000163734 | CXCL3         | 1.551 | 1.16E-10 |
| ENSG00000137968 | SLC44A5       | 1.549 | 0.0003   |
| ENSG00000115008 | IL1A          | 1.549 | 0.0036   |
| ENSG00000198719 | DLL1          | 1.548 | 0.0002   |
| ENSG00000140465 | CYP1A1        | 1.547 | 0.0025   |
| ENSG00000107796 | ACTA2         | 1.546 | 8.93E-38 |
| ENSG00000056558 | TRAF1         | 1.546 | 7.87E-40 |
| ENSG00000008056 | SYN1          | 1.544 | 0.0050   |
| ENSG00000234537 | RP11-100G15.7 | 1.544 | 0.0008   |
| ENSG00000241962 | RP11-111H13.1 | 1.544 | 0.0024   |
| ENSG00000235618 | FAM21EP       | 1.542 | 0.0063   |
| ENSG00000008517 | IL32          | 1.539 | 2.19E-22 |
| ENSG00000175600 | SUGCT         | 1.539 | 6.00E-11 |
| ENSG00000237452 | BHMG1         | 1.534 | 0.0176   |
| ENSG00000272674 | PCDHB16       | 1.532 | 0.0434   |
| ENSG00000169896 | ITGAM         | 1.532 | 1.76E-07 |
| ENSG00000250337 | LINC01021     | 1.532 | 2.12E-17 |
| ENSG00000087085 | ACHE          | 1.531 | 5.31E-10 |
| ENSG00000112299 | VNN1          | 1.529 | 9.99E-08 |
| ENSG00000136383 | ALPK3         | 1.529 | 0.0001   |
| ENSG00000129910 | CDH15         | 1.520 | 0.0046   |
| ENSG00000188993 | LRRC66        | 1.520 | 5.10E-05 |
| ENSG00000111261 | MANSC1        | 1.519 | 1.47E-09 |
| ENSG00000259207 | ITGB3         | 1.515 | 3.62E-39 |
| ENSG00000095752 | IL11          | 1.514 | 4.52E-20 |
| ENSG00000271943 | RP11-222K16.1 | 1.514 | 0.0478   |
| ENSG00000214447 | FAM187A       | 1.513 | 1.72E-31 |

## CCL2-CCL5/CCR4 and radiation response

|                 |               |       |          |
|-----------------|---------------|-------|----------|
| ENSG00000230965 | SNX18P13      | 1.512 | 0.0170   |
| ENSG00000266680 | RP5-1148A21.3 | 1.511 | 0.0003   |
| ENSG00000171509 | RXFP1         | 1.509 | 0.0014   |
| ENSG00000213931 | HBE1          | 1.509 | 0.0069   |
| ENSG00000135679 | MDM2          | 1.508 | 4.21E-71 |
| ENSG00000186197 | EDARADD       | 1.507 | 0.0004   |
| ENSG00000278385 | RP11-89H19.2  | 1.505 | 0.0249   |
| ENSG00000021300 | PLEKHB1       | 1.503 | 0.0030   |
| ENSG00000169583 | CLIC3         | 1.500 | 1.77E-14 |
| ENSG00000157873 | TNFRSF14      | 1.500 | 2.54E-07 |
| ENSG00000225339 | RP11-513I15.6 | 1.500 | 0.0042   |
| ENSG00000103740 | ACSBG1        | 1.499 | 2.88E-07 |
| ENSG00000175040 | CHST2         | 1.496 | 1.09E-15 |
| ENSG00000165072 | MAMDC2        | 1.494 | 5.37E-12 |
| ENSG00000162738 | VANGL2        | 1.493 | 0.0022   |
| ENSG00000173013 | CCDC96        | 1.493 | 2.94E-05 |
| ENSG00000137393 | RNF144B       | 1.487 | 1.03E-06 |
| ENSG00000198108 | CHSY3         | 1.487 | 0.0251   |
| ENSG00000136244 | IL6           | 1.484 | 1.54E-36 |
| ENSG00000198520 | C1orf228      | 1.483 | 1.13E-10 |
| ENSG00000204131 | NHSL2         | 1.481 | 9.12E-05 |
| ENSG00000180422 | LINC00304     | 1.480 | 0.0174   |
| ENSG00000149633 | KIAA1755      | 1.479 | 0.0137   |
| ENSG00000116833 | NR5A2         | 1.479 | 2.28E-11 |
| ENSG00000140379 | BCL2A1        | 1.478 | 8.67E-06 |
| ENSG00000120327 | PCDHB14       | 1.477 | 0.0002   |
| ENSG00000167614 | TTYH1         | 1.474 | 0.0080   |
| ENSG00000197580 | BCO2          | 1.472 | 0.0020   |
| ENSG00000158825 | CDA           | 1.471 | 5.49E-06 |
| ENSG00000248596 | RP11-844P9.5  | 1.467 | 0.0212   |
| ENSG00000275445 | CTD-2649C14.3 | 1.467 | 0.0409   |
| ENSG00000145911 | N4BP3         | 1.465 | 0.0019   |
| ENSG00000050628 | PTGER3        | 1.464 | 0.0025   |
| ENSG00000175463 | TBC1D10C      | 1.463 | 0.0472   |
| ENSG00000253522 | MIR3142HG     | 1.460 | 0.0306   |
| ENSG00000166920 | C15orf48      | 1.459 | 5.19E-42 |
| ENSG00000179023 | KLHDC7A       | 1.457 | 4.78E-09 |
| ENSG00000251630 | RP11-241F15.9 | 1.453 | 0.0472   |
| ENSG00000151617 | EDNRA         | 1.452 | 0.0162   |
| ENSG00000164736 | SOX17         | 1.452 | 0.0046   |
| ENSG00000157064 | NMNAT2        | 1.451 | 0.0003   |
| ENSG00000163661 | PTX3          | 1.444 | 7.23E-13 |
| ENSG00000154822 | PLCL2         | 1.444 | 7.11E-18 |
| ENSG00000120322 | PCDHB8        | 1.442 | 0.0079   |
| ENSG00000186594 | MIR22HG       | 1.440 | 9.77E-25 |
| ENSG00000134548 | SPX           | 1.439 | 2.69E-07 |
| ENSG00000135636 | DYSF          | 1.437 | 0.0015   |
| ENSG00000164850 | GPBR1         | 1.435 | 0.0384   |
| ENSG00000228412 | RP4-625H18.2  | 1.434 | 0.0347   |

## CCL2-CCL5/CCR4 and radiation response

|                 |               |       |          |
|-----------------|---------------|-------|----------|
| ENSG00000165556 | CDX2          | 1.433 | 0.0230   |
| ENSG00000159388 | BTG2          | 1.430 | 1.16E-49 |
| ENSG00000156510 | HKDC1         | 1.427 | 1.44E-07 |
| ENSG00000165887 | ANKRD2        | 1.427 | 3.87E-05 |
| ENSG00000105499 | PLA2G4C       | 1.426 | 2.30E-19 |
| ENSG00000275708 | MIR3648-1     | 1.424 | 0.0080   |
| ENSG00000172602 | RND1          | 1.424 | 7.58E-08 |
| ENSG00000173868 | PHOSPHO1      | 1.420 | 1.12E-05 |
| ENSG00000196872 | KIAA1211L     | 1.416 | 2.40E-06 |
| ENSG00000258376 | RP4-647C14.2  | 1.416 | 1.98E-07 |
| ENSG00000140519 | RHCG          | 1.414 | 0.0005   |
| ENSG00000253540 | FAM86HP       | 1.410 | 0.0005   |
| ENSG00000251455 | RP11-164P12.3 | 1.409 | 0.0202   |
| ENSG00000168481 | LGI3          | 1.405 | 0.0049   |
| ENSG00000139626 | ITGB7         | 1.401 | 0.0066   |
| ENSG00000254560 | BBOX1-AS1     | 1.401 | 0.0149   |
| ENSG00000264044 | RP11-192H23.7 | 1.400 | 0.0265   |
| ENSG00000144843 | ADPRH         | 1.399 | 6.06E-05 |
| ENSG00000153029 | MR1           | 1.398 | 2.09E-30 |
| ENSG00000170373 | CST1          | 1.398 | 1.00E-07 |
| ENSG00000270681 | RP11-372K14.2 | 1.396 | 0.0230   |
| ENSG00000226053 | RP5-1070A16.1 | 1.395 | 0.0378   |
| ENSG00000225969 | ABHD11-AS1    | 1.395 | 0.0036   |
| ENSG00000256540 | RP11-598F7.6  | 1.392 | 0.0136   |
| ENSG00000184347 | SLIT3         | 1.391 | 1.47E-45 |
| ENSG00000138311 | ZNF365        | 1.391 | 0.0002   |
| ENSG00000213760 | ATP6V1G2      | 1.389 | 0.0339   |
| ENSG00000171219 | CDC42BPG      | 1.388 | 2.34E-07 |
| ENSG00000068615 | REEP1         | 1.384 | 0.0026   |
| ENSG00000248751 | RP1-130H16.18 | 1.384 | 0.0309   |
| ENSG00000133687 | TMTC1         | 1.384 | 0.0001   |
| ENSG00000235609 | AF127936.9    | 1.382 | 7.84E-05 |
| ENSG00000055163 | CYFIP2        | 1.381 | 1.36E-69 |
| ENSG00000173678 | SPDYE2B       | 1.381 | 0.0251   |
| ENSG00000260328 | RP11-416I2.1  | 1.378 | 4.06E-09 |
| ENSG00000078237 | TIGAR         | 1.377 | 8.09E-50 |
| ENSG00000166446 | CDYL2         | 1.377 | 0.0019   |
| ENSG00000139567 | ACVRL1        | 1.377 | 0.0041   |
| ENSG00000162552 | WNT4          | 1.376 | 0.0141   |
| ENSG00000265190 | ANXA8         | 1.374 | 8.45E-38 |
| ENSG00000197385 | ZNF860        | 1.373 | 0.0170   |
| ENSG00000166592 | RRAD          | 1.371 | 0.0018   |
| ENSG00000205861 | C1QTNF9B-AS1  | 1.371 | 0.0291   |
| ENSG00000113578 | FGF1          | 1.367 | 0.0077   |
| ENSG00000132965 | ALOX5AP       | 1.366 | 0.0034   |
| ENSG00000267106 | ZNF561-AS1    | 1.363 | 5.18E-08 |
| ENSG00000157570 | TSPAN18       | 1.362 | 0.0415   |
| ENSG00000241935 | HOGA1         | 1.358 | 2.33E-10 |
| ENSG00000182612 | TSPAN10       | 1.354 | 3.78E-07 |

## CCL2-CCL5/CCR4 and radiation response

|                 |               |       |          |
|-----------------|---------------|-------|----------|
| ENSG00000185296 | CTD-2139B15.1 | 1.354 | 0.0331   |
| ENSG00000277639 | RP11-467J12.4 | 1.354 | 1.42E-06 |
| ENSG00000138356 | AOX1          | 1.353 | 6.95E-37 |
| ENSG00000129009 | ISLR          | 1.353 | 0.0001   |
| ENSG00000170099 | SERPINA6      | 1.352 | 0.0173   |
| ENSG00000115009 | CCL20         | 1.352 | 0.0035   |
| ENSG00000273706 | LHX1          | 1.351 | 1.14E-05 |
| ENSG00000156453 | PCDH1         | 1.348 | 0.0022   |
| ENSG00000169116 | PARM1         | 1.347 | 9.71E-07 |
| ENSG00000136603 | SKIL          | 1.346 | 1.24E-33 |
| ENSG00000249673 | NOP14-AS1     | 1.344 | 1.14E-09 |
| ENSG00000124762 | CDKN1A        | 1.342 | 0.0404   |
| ENSG00000169903 | TM4SF4        | 1.339 | 0.0066   |
| ENSG00000116106 | EPHA4         | 1.339 | 2.23E-05 |
| ENSG00000174521 | TTC9B         | 1.334 | 0.0299   |
| ENSG00000116661 | FBX02         | 1.329 | 2.01E-09 |
| ENSG00000277693 | AP003900.6    | 1.328 | 0.0467   |
| ENSG00000182782 | HCAR2         | 1.327 | 0.0394   |
| ENSG00000228824 | MIR4500HG     | 1.327 | 0.0485   |
| ENSG00000146374 | RSPO3         | 1.327 | 5.79E-06 |
| ENSG00000152763 | WDR78         | 1.326 | 0.0028   |
| ENSG00000245105 | A2M-AS1       | 1.326 | 0.0026   |
| ENSG00000181804 | SLC9A9        | 1.326 | 0.0046   |
| ENSG00000282057 | RP4-621F18.2  | 1.325 | 0.0219   |
| ENSG00000167895 | TMC8          | 1.324 | 0.0145   |
| ENSG00000264462 | MIR3648-2     | 1.323 | 0.0187   |
| ENSG00000132357 | CARD6         | 1.323 | 3.72E-14 |
| ENSG00000196502 | SULT1A1       | 1.321 | 1.40E-09 |
| ENSG00000092421 | SEMA6A        | 1.320 | 0.0262   |
| ENSG00000106078 | COBL          | 1.319 | 0.0068   |
| ENSG00000262655 | SPON1         | 1.318 | 0.0144   |
| ENSG00000103196 | CRISPLD2      | 1.316 | 4.06E-28 |
| ENSG00000251257 | CTD-2263F21.1 | 1.315 | 0.0234   |
| ENSG00000275395 | FCGBP         | 1.315 | 1.65E-14 |
| ENSG00000135144 | DTX1          | 1.313 | 0.0145   |
| ENSG00000124257 | NEURL2        | 1.312 | 0.0136   |
| ENSG00000236567 | TCF3P1        | 1.310 | 0.0477   |
| ENSG00000280152 | RP11-331F4.5  | 1.309 | 0.0021   |
| ENSG00000118503 | TNFAIP3       | 1.309 | 2.24E-30 |
| ENSG00000253731 | PCDHGA6       | 1.308 | 0.0006   |
| ENSG00000215246 | RP11-43F13.3  | 1.308 | 0.0004   |
| ENSG00000229851 | ARSD-AS1      | 1.308 | 0.0377   |
| ENSG00000205710 | C17orf107     | 1.306 | 0.0075   |
| ENSG00000185015 | CA13          | 1.303 | 0.0331   |
| ENSG00000091592 | NLRP1         | 1.303 | 2.91E-12 |
| ENSG00000237161 | RP11-32B5.1   | 1.302 | 0.0160   |
| ENSG00000184925 | LCN12         | 1.302 | 0.0010   |
| ENSG00000185101 | AN09          | 1.299 | 0.0121   |
| ENSG00000171931 | FBXW10        | 1.297 | 1.13E-12 |

## CCL2-CCL5/CCR4 and radiation response

|                 |              |       |          |
|-----------------|--------------|-------|----------|
| ENSG00000109472 | CPE          | 1.294 | 0.0204   |
| ENSG00000224321 | RPL12P14     | 1.291 | 0.0200   |
| ENSG00000148357 | HMCN2        | 1.287 | 0.0163   |
| ENSG00000010030 | ETV7         | 1.287 | 0.0033   |
| ENSG00000264717 | CH17-360D5.1 | 1.285 | 7.53E-13 |
| ENSG00000264175 | MIR3189      | 1.283 | 0.0168   |
| ENSG00000118257 | NRP2         | 1.282 | 2.64E-75 |
| ENSG00000049192 | ADAMTS6      | 1.280 | 0.0002   |
| ENSG00000197142 | ACSL5        | 1.280 | 0.0069   |
| ENSG00000144847 | IGSF11       | 1.279 | 0.0216   |
| ENSG00000260401 | RP11-800A3.4 | 1.278 | 1.62E-05 |
| ENSG00000163803 | PLB1         | 1.276 | 0.0005   |
| ENSG00000204174 | NPY4R        | 1.276 | 6.23E-19 |
| ENSG00000229891 | LINC01315    | 1.275 | 0.0103   |
| ENSG00000260193 | RP11-83N9.5  | 1.275 | 0.0003   |
| ENSG00000103742 | IGDCC4       | 1.272 | 3.75E-09 |
| ENSG00000101098 | RIMS4        | 1.270 | 0.0019   |
| ENSG00000178404 | CEP295NL     | 1.270 | 0.0134   |
| ENSG00000138623 | SEMA7A       | 1.270 | 0.0003   |
| ENSG00000279699 | RP1-102K2.9  | 1.268 | 0.0290   |
| ENSG00000232070 | TMEM253      | 1.265 | 0.0036   |
| ENSG00000182752 | PAPPA        | 1.264 | 6.43E-37 |
| ENSG00000271334 | CTD-2078B5.2 | 1.263 | 0.0128   |
| ENSG00000174899 | PQLC2L       | 1.261 | 0.0003   |
| ENSG00000279806 | RP11-5809.2  | 1.261 | 3.33E-34 |
| ENSG00000168487 | BMP1         | 1.261 | 5.36E-28 |
| ENSG00000281991 | TMEM265      | 1.260 | 0.0023   |
| ENSG00000158887 | MPZ          | 1.259 | 0.0003   |
| ENSG00000166448 | TMEM130      | 1.258 | 1.35E-06 |
| ENSG00000126970 | ZC4H2        | 1.258 | 3.04E-10 |
| ENSG00000125966 | MMP24        | 1.256 | 9.05E-13 |
| ENSG00000186994 | KANK3        | 1.256 | 9.34E-09 |
| ENSG00000160207 | HSF2BP       | 1.251 | 0.0026   |
| ENSG00000076604 | TRAF4        | 1.249 | 8.41E-20 |
| ENSG00000111181 | SLC6A12      | 1.248 | 0.0008   |
| ENSG00000169403 | PTAFR        | 1.247 | 0.0040   |
| ENSG00000008735 | MAPK8IP2     | 1.247 | 1.79E-16 |
| ENSG00000269486 | CTC-360G5.9  | 1.247 | 2.43E-05 |
| ENSG00000275793 | RIMBP3       | 1.247 | 1.29E-05 |
| ENSG00000135477 | KRT87P       | 1.245 | 0.0006   |
| ENSG00000139132 | FGD4         | 1.243 | 0.0008   |
| ENSG00000170545 | SMAGP        | 1.242 | 9.43E-07 |
| ENSG00000148735 | PLEKHS1      | 1.241 | 1.84E-08 |
| ENSG00000082126 | MPP4         | 1.241 | 0.0004   |
| ENSG00000211448 | DIO2         | 1.239 | 0.0013   |
| ENSG00000103888 | CEMIP        | 1.238 | 7.07E-05 |
| ENSG00000198133 | TMEM229B     | 1.237 | 0.0345   |
| ENSG00000238005 | RP11-443B7.1 | 1.237 | 0.0001   |
| ENSG00000183134 | PTGDR2       | 1.236 | 0.0339   |



## CCL2-CCL5/CCR4 and radiation response

|                 |                |       |          |
|-----------------|----------------|-------|----------|
| ENSG00000170647 | TMEM133        | 1.235 | 0.0153   |
| ENSG00000141469 | SLC14A1        | 1.234 | 0.0116   |
| ENSG00000170006 | TMEM154        | 1.231 | 0.0103   |
| ENSG00000172667 | ZMAT3          | 1.231 | 0.0030   |
| ENSG00000134198 | TSPAN2         | 1.231 | 0.0311   |
| ENSG00000177106 | EPS8L2         | 1.230 | 5.08E-19 |
| ENSG00000158125 | XDH            | 1.230 | 2.25E-10 |
| ENSG00000135919 | SERPINE2       | 1.228 | 1.14E-29 |
| ENSG00000114779 | ABHD14B        | 1.227 | 4.16E-24 |
| ENSG00000197646 | PDCD1LG2       | 1.227 | 0.0002   |
| ENSG00000183729 | NPBWR1         | 1.226 | 0.0256   |
| ENSG00000249867 | RP11-115J23.1  | 1.226 | 0.0023   |
| ENSG00000261456 | TUBB8          | 1.225 | 0.0246   |
| ENSG00000139899 | CBLN3          | 1.224 | 2.14E-10 |
| ENSG00000173705 | SUSD5          | 1.223 | 3.41E-19 |
| ENSG00000179772 | FOXS1          | 1.222 | 0.0009   |
| ENSG00000106366 | SERPINE1       | 1.221 | 5.88E-48 |
| ENSG00000170381 | SEMA3E         | 1.220 | 2.66E-05 |
| ENSG00000100604 | CHGA           | 1.220 | 2.22E-05 |
| ENSG00000106772 | PRUNE2         | 1.219 | 9.13E-05 |
| ENSG00000028137 | TNFRSF1B       | 1.218 | 0.0002   |
| ENSG00000272070 | AC005618.6     | 1.218 | 0.0070   |
| ENSG00000038427 | VCAN           | 1.218 | 8.24E-27 |
| ENSG00000107104 | KANK1          | 1.218 | 0.0068   |
| ENSG00000279821 | RP11-1334A24.5 | 1.217 | 9.90E-06 |
| ENSG00000143355 | LHX9           | 1.216 | 0.0187   |
| ENSG00000145022 | TCTA           | 1.216 | 0.0048   |
| ENSG00000198794 | SCAMP5         | 1.212 | 1.10E-13 |
| ENSG00000197380 | DACT3          | 1.211 | 0.0438   |
| ENSG00000267681 | CTD-3199J23.6  | 1.211 | 0.0081   |
| ENSG00000161249 | DMKN           | 1.211 | 4.55E-09 |
| ENSG00000223403 | MEG9           | 1.205 | 0.0223   |
| ENSG00000160326 | SLC2A6         | 1.205 | 6.76E-30 |
| ENSG00000128849 | CGNL1          | 1.204 | 2.75E-05 |
| ENSG00000166394 | CYB5R2         | 1.203 | 7.52E-09 |
| ENSG00000006606 | CCL26          | 1.203 | 1.01E-06 |
| ENSG00000130513 | GDF15          | 1.202 | 3.72E-28 |
| ENSG00000262678 | RP5-1050D4.4   | 1.201 | 0.0119   |
| ENSG00000271380 | RP11-307C12.12 | 1.199 | 0.0006   |
| ENSG00000198774 | RASSF9         | 1.199 | 0.0006   |
| ENSG00000125347 | IRF1           | 1.197 | 7.68E-35 |
| ENSG00000163520 | FBLN2          | 1.196 | 0.0216   |
| ENSG00000267475 | CTD-2538C1.2   | 1.195 | 0.0215   |
| ENSG00000182578 | CSF1R          | 1.195 | 0.0130   |
| ENSG00000091262 | ABCC6          | 1.194 | 6.58E-05 |
| ENSG00000099889 | ARVCF          | 1.192 | 2.35E-07 |
| ENSG00000175591 | P2RY2          | 1.190 | 1.28E-06 |
| ENSG00000130635 | COL5A1         | 1.189 | 2.36E-31 |
| ENSG00000279692 | RP11-1055B8.1  | 1.187 | 0.0037   |

## CCL2-CCL5/CCR4 and radiation response

|                 |               |       |          |
|-----------------|---------------|-------|----------|
| ENSG00000183044 | ABAT          | 1.185 | 3.59E-06 |
| ENSG00000102109 | PCSK1N        | 1.184 | 2.82E-11 |
| ENSG00000115414 | FN1           | 1.184 | 3.24E-28 |
| ENSG00000064205 | WISP2         | 1.183 | 3.94E-13 |
| ENSG00000280587 | LINC01348     | 1.182 | 0.0002   |
| ENSG00000105699 | LSR           | 1.182 | 2.99E-05 |
| ENSG00000180787 | ZFP3          | 1.182 | 0.0198   |
| ENSG00000258461 | RP11-164J13.1 | 1.181 | 0.0045   |
| ENSG00000173546 | CSPG4         | 1.179 | 0.0001   |
| ENSG00000129993 | CBFA2T3       | 1.178 | 0.0239   |
| ENSG00000276851 | RP5-875H18.9  | 1.177 | 1.85E-08 |
| ENSG00000281490 | CICP14        | 1.175 | 2.08E-08 |
| ENSG00000232692 | AP001596.6    | 1.175 | 0.0309   |
| ENSG00000107742 | SPOCK2        | 1.173 | 7.38E-05 |
| ENSG00000149506 | ZP1           | 1.173 | 0.0047   |
| ENSG00000069667 | RORA          | 1.173 | 0.0001   |
| ENSG00000183171 | RP11-49C9.2   | 1.173 | 0.0155   |
| ENSG00000177409 | SAMD9L        | 1.173 | 1.98E-12 |
| ENSG00000274214 | RP11-757O6.6  | 1.172 | 0.0136   |
| ENSG00000152137 | HSPB8         | 1.171 | 1.60E-11 |
| ENSG00000238228 | OR7E7P        | 1.169 | 0.0090   |
| ENSG00000100292 | HMOX1         | 1.169 | 6.56E-35 |
| ENSG00000145287 | PLAC8         | 1.169 | 0.0360   |
| ENSG00000062038 | CDH3          | 1.168 | 3.53E-05 |
| ENSG00000117461 | PIK3R3        | 1.167 | 3.62E-13 |
| ENSG00000198934 | MAGEE1        | 1.163 | 4.12E-06 |
| ENSG00000184985 | SORCS2        | 1.162 | 2.85E-08 |
| ENSG00000198440 | ZNF583        | 1.161 | 3.02E-06 |
| ENSG00000184584 | TMEM173       | 1.161 | 1.31E-05 |
| ENSG00000162772 | ATF3          | 1.160 | 9.35E-10 |
| ENSG00000132386 | SERPINF1      | 1.159 | 0.0012   |
| ENSG00000258777 | HIF1A-AS1     | 1.158 | 0.0035   |
| ENSG00000135127 | BICDL1        | 1.158 | 8.82E-08 |
| ENSG00000105559 | PLEKHA4       | 1.158 | 2.89E-05 |
| ENSG00000019505 | SYT13         | 1.157 | 1.29E-07 |
| ENSG00000164674 | SYTL3         | 1.157 | 0.0286   |
| ENSG00000095739 | BAMBI         | 1.156 | 1.83E-14 |
| ENSG00000164051 | CCDC51        | 1.156 | 0.0358   |
| ENSG00000108947 | EFNB3         | 1.156 | 0.0255   |
| ENSG00000083812 | ZNF324        | 1.156 | 6.86E-06 |
| ENSG00000227496 | RP11-145A3.1  | 1.156 | 0.0029   |
| ENSG00000135678 | CPM           | 1.155 | 2.11E-24 |
| ENSG00000248187 | RP11-184M15.1 | 1.155 | 7.00E-11 |
| ENSG00000168016 | TRANK1        | 1.152 | 1.24E-15 |
| ENSG00000228492 | RAB11FIP1P1   | 1.151 | 9.84E-06 |
| ENSG00000260944 | FOXC2-AS1     | 1.150 | 0.0010   |
| ENSG00000158315 | RHBDL2        | 1.149 | 3.65E-05 |
| ENSG00000033100 | CHPF2         | 1.148 | 5.81E-47 |
| ENSG00000131378 | RFTN1         | 1.147 | 1.44E-27 |

## CCL2-CCL5/CCR4 and radiation response

|                 |               |       |          |
|-----------------|---------------|-------|----------|
| ENSG00000256628 | ZBTB11-AS1    | 1.147 | 2.43E-09 |
| ENSG00000135604 | STX11         | 1.147 | 0.0001   |
| ENSG00000269951 | RP11-797A18.6 | 1.145 | 0.0198   |
| ENSG00000254607 | RP11-115C10.1 | 1.142 | 0.0385   |
| ENSG00000260633 | RP11-375I20.6 | 1.142 | 0.0239   |
| ENSG00000221890 | NPTXR         | 1.141 | 4.38E-25 |
| ENSG00000215559 | ANKRD20A11P   | 1.140 | 0.0043   |
| ENSG00000167600 | CYP2S1        | 1.137 | 2.31E-12 |
| ENSG00000123700 | KCNJ2         | 1.137 | 1.70E-09 |
| ENSG00000228314 | CYP4F29P      | 1.137 | 7.25E-07 |
| ENSG00000058085 | LAMC2         | 1.136 | 1.21E-53 |
| ENSG00000092529 | CAPN3         | 1.134 | 0.0297   |
| ENSG00000198959 | TGM2          | 1.134 | 1.67E-51 |
| ENSG00000177675 | CD163L1       | 1.133 | 2.37E-08 |
| ENSG00000138646 | HERC5         | 1.132 | 1.01E-13 |
| ENSG00000142156 | COL6A1        | 1.132 | 1.09E-28 |
| ENSG00000272933 | RP11-47A8.5   | 1.131 | 4.81E-09 |
| ENSG00000183346 | C10orf107     | 1.130 | 0.0006   |
| ENSG00000183287 | CCBE1         | 1.130 | 3.48E-11 |
| ENSG00000166833 | NAV2          | 1.128 | 0.0009   |
| ENSG00000228570 | NUTM2E        | 1.123 | 0.0114   |
| ENSG00000049089 | COL9A2        | 1.120 | 0.0186   |
| ENSG00000272695 | GAS6-AS2      | 1.119 | 3.73E-06 |
| ENSG00000101842 | VSIG1         | 1.118 | 0.0204   |
| ENSG00000140678 | ITGAX         | 1.114 | 2.92E-06 |
| ENSG00000197757 | HOXC6         | 1.113 | 0.0086   |
| ENSG00000165434 | PGM2L1        | 1.113 | 1.97E-20 |
| ENSG00000187957 | DNER          | 1.112 | 0.0001   |
| ENSG00000187860 | CCDC157       | 1.109 | 0.0145   |
| ENSG00000140416 | TPM1          | 1.105 | 1.20E-22 |
| ENSG00000266993 | RP4-657D16.3  | 1.105 | 0.0154   |
| ENSG00000269994 | RP11-276H19.2 | 1.103 | 0.0414   |
| ENSG00000234546 | RP3-510D11.2  | 1.102 | 0.0019   |
| ENSG00000111348 | ARHGDI1B      | 1.100 | 7.02E-07 |
| ENSG00000182492 | BGN           | 1.100 | 0.0161   |
| ENSG00000148677 | ANKRD1        | 1.099 | 9.48E-09 |
| ENSG00000184368 | MAP7D2        | 1.099 | 0.0032   |
| ENSG00000227268 | KLLN          | 1.099 | 1.56E-05 |
| ENSG00000100647 | SUSD6         | 1.098 | 4.83E-24 |
| ENSG00000155792 | DEPTOR        | 1.098 | 0.0001   |
| ENSG00000069020 | MAST4         | 1.097 | 2.33E-06 |
| ENSG00000121270 | ABCC11        | 1.097 | 0.0365   |
| ENSG00000123095 | BHLHE41       | 1.096 | 4.39E-12 |
| ENSG00000185909 | KLHDC8B       | 1.095 | 0.0037   |
| ENSG00000166847 | DCTN5         | 1.095 | 0.0230   |
| ENSG00000238271 | IFNWP19       | 1.094 | 4.34E-06 |
| ENSG00000099139 | PCSK5         | 1.093 | 0.0395   |
| ENSG00000111885 | MAN1A1        | 1.092 | 2.60E-05 |
| ENSG00000070614 | NDST1         | 1.092 | 0.0027   |

## CCL2-CCL5/CCR4 and radiation response

|                 |                  |       |          |
|-----------------|------------------|-------|----------|
| ENSG00000169894 | MUC3A            | 1.091 | 0.0028   |
| ENSG00000176125 | UFSP1            | 1.091 | 0.0042   |
| ENSG00000147003 | TMEM27           | 1.088 | 0.0412   |
| ENSG00000113070 | HBEGF            | 1.088 | 4.27E-20 |
| ENSG00000244242 | IFITM10          | 1.084 | 0.0002   |
| ENSG00000124225 | PMEPA1           | 1.084 | 7.41E-24 |
| ENSG00000089199 | CHGB             | 1.084 | 6.97E-09 |
| ENSG00000118515 | SGK1             | 1.082 | 2.42E-24 |
| ENSG00000140092 | FBLN5            | 1.082 | 0.0009   |
| ENSG00000211455 | STK38L           | 1.082 | 7.96E-09 |
| ENSG00000156804 | FBX032           | 1.082 | 1.21E-13 |
| ENSG00000173928 | SWSAP1           | 1.080 | 0.0136   |
| ENSG00000170801 | HTRA3            | 1.080 | 0.0002   |
| ENSG00000198125 | MB               | 1.077 | 0.0302   |
| ENSG00000267452 | RP11-1018N14.5   | 1.077 | 0.0475   |
| ENSG00000159713 | TPPP3            | 1.077 | 0.0023   |
| ENSG00000213654 | GPSM3            | 1.077 | 0.0057   |
| ENSG00000235423 | RP11-282018.3    | 1.075 | 0.0022   |
| ENSG00000185483 | ROR1             | 1.074 | 2.15E-21 |
| ENSG00000183876 | ARSI             | 1.073 | 2.11E-12 |
| ENSG00000203499 | FAM83H-AS1       | 1.073 | 0.0007   |
| ENSG00000174137 | FAM53A           | 1.072 | 0.0075   |
| ENSG00000126882 | FAM78A           | 1.071 | 0.0001   |
| ENSG00000137752 | CASP1            | 1.071 | 1.34E-10 |
| ENSG00000167080 | B4GALNT2         | 1.068 | 7.08E-13 |
| ENSG00000172508 | CARNS1           | 1.068 | 0.0302   |
| ENSG00000213468 | FIRRE            | 1.067 | 0.0227   |
| ENSG00000184492 | FOXD4L1          | 1.066 | 0.0260   |
| ENSG00000267104 | TBC1D3P1-DHX40P1 | 1.064 | 0.0070   |
| ENSG00000280002 | RP11-76C10.6     | 1.063 | 0.0362   |
| ENSG00000167772 | ANGPTL4          | 1.062 | 2.92E-27 |
| ENSG00000177694 | NAALADL2         | 1.061 | 0.0070   |
| ENSG00000164220 | F2RL2            | 1.060 | 3.95E-12 |
| ENSG00000100906 | NFKBIA           | 1.059 | 3.69E-30 |
| ENSG00000143341 | HMCN1            | 1.058 | 8.32E-05 |
| ENSG00000184497 | TMEM255B         | 1.058 | 0.0007   |
| ENSG00000204514 | ZNF814           | 1.056 | 4.13E-05 |
| ENSG00000230438 | SERPINB9P1       | 1.056 | 0.0251   |
| ENSG00000129946 | SHC2             | 1.053 | 0.0001   |
| ENSG00000110092 | CCND1            | 1.051 | 5.55E-62 |
| ENSG00000196793 | ZNF239           | 1.051 | 0.0003   |
| ENSG00000161513 | FDXR             | 1.049 | 2.28E-22 |
| ENSG00000171533 | MAP6             | 1.049 | 2.48E-11 |
| ENSG00000138207 | RBP4             | 1.049 | 0.0346   |
| ENSG00000154760 | SLFN13           | 1.048 | 0.0108   |
| ENSG00000259370 | RP11-1069G10.1   | 1.047 | 0.0104   |
| ENSG00000154114 | TBCEL            | 1.046 | 3.97E-07 |
| ENSG00000174514 | MFSD4A           | 1.046 | 0.0187   |
| ENSG00000081041 | CXCL2            | 1.045 | 5.15E-15 |

## CCL2-CCL5/CCR4 and radiation response

|                 |               |       |          |
|-----------------|---------------|-------|----------|
| ENSG00000267254 | ZNF790-AS1    | 1.044 | 0.0063   |
| ENSG00000140022 | STON2         | 1.044 | 0.0145   |
| ENSG00000233695 | GAS6-AS1      | 1.044 | 1.08E-11 |
| ENSG00000080573 | COL5A3        | 1.043 | 2.41E-06 |
| ENSG00000261342 | AC006538.1    | 1.043 | 0.0155   |
| ENSG00000273382 | RP5-1065J22.8 | 1.043 | 0.0011   |
| ENSG00000139278 | GLIPR1        | 1.042 | 2.37E-37 |
| ENSG00000171428 | NAT1          | 1.042 | 0.0230   |
| ENSG00000174808 | BTC           | 1.041 | 4.26E-09 |
| ENSG00000067715 | SYT1          | 1.041 | 4.59E-05 |
| ENSG00000140931 | CMTM3         | 1.038 | 1.17E-21 |
| ENSG00000166016 | ABTB2         | 1.037 | 3.00E-23 |
| ENSG00000121068 | TBX2          | 1.037 | 6.75E-18 |
| ENSG00000258130 | RP11-347C12.3 | 1.036 | 0.0062   |
| ENSG00000185669 | SNAI3         | 1.035 | 0.0010   |
| ENSG00000143786 | CNIH3         | 1.034 | 0.0031   |
| ENSG00000283294 | RP11-681B3.4  | 1.032 | 0.0003   |
| ENSG00000185055 | EFCAB10       | 1.030 | 2.83E-05 |
| ENSG00000227953 | LINC01341     | 1.028 | 0.0139   |
| ENSG00000236022 | RP11-160E2.16 | 1.028 | 0.0387   |
| ENSG00000115226 | FNDC4         | 1.026 | 0.0009   |
| ENSG00000114270 | COL7A1        | 1.026 | 5.23E-41 |
| ENSG00000116962 | NID1          | 1.026 | 0.0079   |
| ENSG00000187837 | HIST1H1C      | 1.026 | 3.45E-22 |
| ENSG00000242732 | RGAG4         | 1.024 | 3.19E-11 |
| ENSG00000170962 | PDGFD         | 1.023 | 1.47E-16 |
| ENSG00000126561 | STAT5A        | 1.023 | 7.96E-09 |
| ENSG00000225614 | ZNF469        | 1.023 | 2.17E-19 |
| ENSG00000166147 | FBN1          | 1.021 | 7.48E-24 |
| ENSG00000165804 | ZNF219        | 1.021 | 2.75E-28 |
| ENSG00000250091 | DNAH100S      | 1.020 | 0.0195   |
| ENSG00000188015 | S100A3        | 1.017 | 6.49E-15 |
| ENSG00000181458 | TMEM45A       | 1.017 | 5.33E-06 |
| ENSG00000187796 | CARD9         | 1.017 | 0.0136   |
| ENSG00000189001 | SBSN          | 1.016 | 0.0020   |
| ENSG00000126947 | ARMCX1        | 1.016 | 6.83E-07 |
| ENSG00000185112 | FAM43A        | 1.015 | 0.0030   |
| ENSG00000264230 | ANXA8L1       | 1.015 | 2.82E-25 |
| ENSG00000100626 | GALNT16       | 1.014 | 2.66E-09 |
| ENSG00000164308 | ERAP2         | 1.010 | 2.74E-06 |
| ENSG00000136235 | GPNMB         | 1.010 | 0.0196   |
| ENSG00000174307 | PHLDA3        | 1.010 | 6.59E-35 |
| ENSG00000184988 | TMEM106A      | 1.008 | 0.0005   |
| ENSG00000170629 | DPY19L2P2     | 1.006 | 0.0079   |
| ENSG00000256235 | SMIM3         | 1.005 | 0.0001   |
| ENSG00000269937 | RP11-20I23.8  | 1.003 | 0.0270   |
| ENSG00000234869 | RP3-439F8.1   | 1.002 | 0.0323   |
| ENSG00000261613 | RP11-20I23.13 | 1.000 | 0.0016   |
| ENSG00000183578 | TNFAIP8L3     | 1.000 | 2.36E-06 |

## CCL2-CCL5/CCR4 and radiation response

**Supplementary Table 2.** Identification of significantly down-regulated genes in irradiated HPAEpiC cells using RNA-seq

| Gene_ID         | Symbol         | log2 Fold Change | P value |
|-----------------|----------------|------------------|---------|
| ENSG00000125931 | CITED1         | -1.055           | 0.0497  |
| ENSG00000174236 | REP15          | -1.08            | 0.0496  |
| ENSG00000235748 | SEPT14P12      | -1.93            | 0.0488  |
| ENSG00000272905 | RP11-265E18.1  | -2.131           | 0.048   |
| ENSG00000257803 | RP11-575G13.2  | -2.225           | 0.0476  |
| ENSG00000263080 | RP11-485G7.5   | -1.129           | 0.0475  |
| ENSG00000251013 | GAPDHP62       | -1.007           | 0.0475  |
| ENSG00000268649 | MIR296         | -1.134           | 0.0466  |
| ENSG00000185303 | SFTPA2         | -2.273           | 0.0465  |
| ENSG00000259155 | RP11-831F12.3  | -1.382           | 0.0464  |
| ENSG00000017483 | SLC38A5        | -1.09            | 0.0461  |
| ENSG00000271937 | RP11-424N24.2  | -1.874           | 0.046   |
| ENSG00000244462 | RBM12          | -1.065           | 0.0459  |
| ENSG00000129317 | PUS7L          | -1.703           | 0.0457  |
| ENSG00000232855 | AF131217.1     | -2.025           | 0.0454  |
| ENSG00000168454 | TXNDC2         | -1.888           | 0.0453  |
| ENSG00000273287 | CTA-268H5.14   | -1.864           | 0.0452  |
| ENSG00000250021 | C15orf38-AP3S2 | -1.77            | 0.0445  |
| ENSG00000233246 | RP11-415J8.5   | -1.978           | 0.0436  |
| ENSG00000268750 | CTD-2583A14.10 | -1.128           | 0.0436  |
| ENSG00000272141 | RP11-465B22.8  | -1.945           | 0.0436  |
| ENSG00000276203 | ANKRD20A3      | -1.404           | 0.0435  |
| ENSG00000278419 | RP11-298E9.7   | -2.588           | 0.0433  |
| ENSG00000134962 | KLB            | -1.39            | 0.0432  |
| ENSG00000272576 | RP11-365H22.2  | -1.582           | 0.0426  |
| ENSG00000139187 | KLRG1          | -1.21            | 0.0423  |
| ENSG00000228663 | PSMD10P1       | -2.292           | 0.0413  |
| ENSG00000187122 | SLIT1          | -1.168           | 0.0405  |
| ENSG00000156097 | GPR61          | -1.246           | 0.0405  |
| ENSG00000258186 | SLC7A5P2       | -1.419           | 0.0394  |
| ENSG00000243675 | RP11-379F4.1   | -2.213           | 0.0394  |
| ENSG00000262222 | RP11-876N24.4  | -1.253           | 0.0392  |
| ENSG00000253476 | RP11-395I14.2  | -1.28            | 0.0389  |
| ENSG00000258725 | PRC1-AS1       | -1.135           | 0.0388  |
| ENSG00000226520 | KIRREL-IT1     | -1.415           | 0.0381  |
| ENSG00000277151 | RP11-380B4.3   | -2.33            | 0.0381  |
| ENSG00000237248 | LINC00987      | -1.386           | 0.0376  |
| ENSG00000086570 | FAT2           | -2.251           | 0.0374  |
| ENSG00000263786 | RP11-649A18.4  | -1.006           | 0.0373  |
| ENSG00000267125 | CTB-31020.6    | -2.21            | 0.0372  |
| ENSG00000155087 | ODF1           | -2.231           | 0.0364  |
| ENSG00000197406 | DIO3           | -2.112           | 0.0363  |
| ENSG00000240006 | RP11-200A1.1   | -2.218           | 0.0361  |
| ENSG00000279758 | RP11-752G15.10 | -1.076           | 0.0359  |
| ENSG00000232977 | LINC00327      | -2.364           | 0.0358  |
| ENSG00000267030 | CTB-50L17.7    | -1.681           | 0.0356  |

## CCL2-CCL5/CCR4 and radiation response

|                 |                |        |        |
|-----------------|----------------|--------|--------|
| ENSG00000120341 | SEC16B         | -1.81  | 0.0356 |
| ENSG00000273076 | RP3-508I15.22  | -1.977 | 0.0349 |
| ENSG00000249363 | CTB-78021.1    | -2.301 | 0.0348 |
| ENSG00000124215 | CDH26          | -1.276 | 0.0346 |
| ENSG00000276712 | MIR7111        | -1.108 | 0.0344 |
| ENSG00000186105 | LRRC70         | -2.276 | 0.0338 |
| ENSG00000271009 | RP11-346C20.3  | -1.994 | 0.0338 |
| ENSG00000225806 | RP1-309F20.3   | -1.981 | 0.0337 |
| ENSG00000272017 | RP1-199J3.7    | -1.322 | 0.0335 |
| ENSG00000181856 | SLC2A4         | -1.364 | 0.0332 |
| ENSG00000230333 | AC004538.3     | -1.001 | 0.0331 |
| ENSG00000229447 | RP11-490K7.4   | -1.342 | 0.0329 |
| ENSG00000272843 | RP11-313P13.5  | -1.982 | 0.0328 |
| ENSG00000267430 | RP11-635N19.2  | -2.426 | 0.0327 |
| ENSG00000269559 | RP11-629B11.5  | -1.355 | 0.0327 |
| ENSG00000140009 | ESR2           | -1.042 | 0.0319 |
| ENSG00000273000 | KB-1572G7.2    | -1.596 | 0.0318 |
| ENSG00000232531 | AC027612.1     | -1.103 | 0.0316 |
| ENSG00000265912 | RP11-583F2.2   | -1.978 | 0.0314 |
| ENSG00000173838 | 10-Mar         | -2.013 | 0.0313 |
| ENSG00000278852 | NPPA-AS1_2     | -1.75  | 0.0312 |
| ENSG00000160352 | ZNF714         | -1.256 | 0.0311 |
| ENSG00000213939 | RP11-314A20.1  | -1.113 | 0.0309 |
| ENSG00000275383 | RP11-615I2.6   | -2.392 | 0.0306 |
| ENSG00000130649 | CYP2E1         | -1.219 | 0.0304 |
| ENSG00000214132 | RP11-420016.2  | -2.398 | 0.0304 |
| ENSG00000196628 | TCF4           | -1.402 | 0.0302 |
| ENSG00000278931 | bP-218909.2    | -1.04  | 0.0295 |
| ENSG00000226318 | RP11-474D14.2  | -1.801 | 0.0294 |
| ENSG00000237343 | RP11-763B22.4  | -2.458 | 0.0292 |
| ENSG00000260526 | RP11-73K9.2    | -1.002 | 0.0289 |
| ENSG00000281808 | SNORA17        | -1.37  | 0.0285 |
| ENSG00000235852 | AC005540.3     | -1.566 | 0.0281 |
| ENSG00000237852 | RP4-630A11.3   | -1.948 | 0.0279 |
| ENSG00000126217 | MCF2L          | -1.334 | 0.0269 |
| ENSG00000057468 | MSH4           | -2.377 | 0.0264 |
| ENSG00000244556 | ODCP           | -1.297 | 0.0264 |
| ENSG00000270179 | RP11-159N11.4  | -1.01  | 0.0262 |
| ENSG00000214946 | TBC1D26        | -2.409 | 0.0261 |
| ENSG00000213397 | HAUS7          | -1.032 | 0.0257 |
| ENSG00000260100 | RP11-220I1.5   | -2.364 | 0.0254 |
| ENSG00000248235 | AC037459.4     | -1.898 | 0.0252 |
| ENSG00000276524 | RP11-323F24.3  | -2.052 | 0.0248 |
| ENSG00000274341 | RP11-227G15.10 | -1.544 | 0.0243 |
| ENSG00000259396 | RP11-1609.2    | -2.535 | 0.0242 |
| ENSG00000228828 | RP11-162G10.1  | -2.479 | 0.0239 |
| ENSG00000268041 | CTD-2575K13.6  | -1.077 | 0.0235 |
| ENSG00000262155 | RP11-266L9.5   | -1.108 | 0.0235 |
| ENSG00000234491 | HNRNPA1P51     | -1.805 | 0.0232 |

## CCL2-CCL5/CCR4 and radiation response

|                 |               |        |        |
|-----------------|---------------|--------|--------|
| ENSG00000251441 | RTEL1P1       | -2.065 | 0.0231 |
| ENSG00000235351 | AC114730.11   | -1.542 | 0.0228 |
| ENSG00000231028 | LINC00271     | -2.042 | 0.0228 |
| ENSG00000231473 | LINC00441     | -2.041 | 0.0221 |
| ENSG00000275401 | RP4-564F22.7  | -2.629 | 0.0215 |
| ENSG00000222014 | RAB6C         | -2.599 | 0.0215 |
| ENSG00000232613 | AC007386.4    | -2.492 | 0.0214 |
| ENSG00000213070 | HMGB3P6       | -1.212 | 0.0214 |
| ENSG00000283078 | RP11-11M20.4  | -2.423 | 0.0213 |
| ENSG00000227001 | NBPF2P        | -1.407 | 0.0211 |
| ENSG00000280423 | RP11-299J5.1  | -2.564 | 0.0208 |
| ENSG00000256167 | ATF4P4        | -1.631 | 0.0204 |
| ENSG00000274015 | CTD-2302E22.6 | -2.202 | 0.0198 |
| ENSG00000261757 | AC005592.3    | -2.093 | 0.0196 |
| ENSG00000254862 | RP11-159H22.2 | -2.128 | 0.019  |
| ENSG00000272008 | RP11-393I2.4  | -1.48  | 0.019  |
| ENSG00000277232 | GTSE1-AS1     | -1.107 | 0.0186 |
| ENSG00000259488 | RP11-154J22.1 | -1.066 | 0.0185 |
| ENSG00000091137 | SLC26A4       | -1.092 | 0.0183 |
| ENSG00000151135 | TMEM263       | -1.256 | 0.0183 |
| ENSG00000232987 | LINC01219     | -2.13  | 0.0176 |
| ENSG00000260907 | AC008088.4    | -1.379 | 0.0174 |
| ENSG00000198040 | ZNF84         | -1.343 | 0.0174 |
| ENSG00000157600 | TMEM164       | -1.471 | 0.0172 |
| ENSG00000236581 | STARD13-AS    | -1.399 | 0.0172 |
| ENSG00000108551 | RASD1         | -2.09  | 0.017  |
| ENSG00000270720 | RP11-84C13.2  | -2.425 | 0.0169 |
| ENSG00000260423 | RP13-735L24.1 | -2.24  | 0.0166 |
| ENSG00000198221 | AFDN-AS1      | -1.297 | 0.0166 |
| ENSG00000235489 | DBF4P1        | -1.506 | 0.0165 |
| ENSG00000233296 | AC092159.2    | -2.116 | 0.0163 |
| ENSG00000228393 | LINC01004     | -1.293 | 0.0163 |
| ENSG00000213539 | YBX1P6        | -2.412 | 0.016  |
| ENSG00000243055 | GK-AS1        | -2.562 | 0.0155 |
| ENSG00000251350 | LVCAT1        | -1.422 | 0.0154 |
| ENSG00000243181 | RP11-734J24.1 | -1.393 | 0.0154 |
| ENSG00000247151 | CSTF3-AS1     | -1.455 | 0.015  |
| ENSG00000104722 | NEFM          | -2.674 | 0.0149 |
| ENSG00000224992 | RP11-295G24.5 | -1.177 | 0.014  |
| ENSG00000261997 | RP11-212I21.4 | -1.357 | 0.0137 |
| ENSG00000279982 | RP11-45A17.3  | -1.472 | 0.0131 |
| ENSG00000259010 | RP11-973N13.2 | -2.549 | 0.0124 |
| ENSG00000273925 | RP11-227D13.5 | -2.586 | 0.0123 |
| ENSG00000232713 | AC010733.5    | -1.363 | 0.0122 |
| ENSG00000227014 | AC007285.6    | -1.321 | 0.0121 |
| ENSG00000237594 | AP000251.3    | -2.235 | 0.012  |
| ENSG00000214289 | RPL39P5       | -1.452 | 0.0116 |
| ENSG00000137960 | GIPC2         | -2.761 | 0.0111 |
| ENSG00000186897 | C1QL4         | -1.012 | 0.0107 |



## CCL2-CCL5/CCR4 and radiation response

|                 |               |        |        |
|-----------------|---------------|--------|--------|
| ENSG00000170509 | HSD17B13      | -2.211 | 0.0105 |
| ENSG00000257474 | RP11-359M6.1  | -2.761 | 0.0102 |
| ENSG00000181350 | LRRC75A       | -1.16  | 0.0102 |
| ENSG00000257108 | NHLRC4        | -1.543 | 0.0099 |
| ENSG00000168813 | ZNF507        | -1.134 | 0.0098 |
| ENSG00000279081 | AL356585.1    | -1.522 | 0.0097 |
| ENSG00000183148 | ANKRD20A2     | -1.316 | 0.0097 |
| ENSG00000144827 | ABHD10        | -1.194 | 0.0093 |
| ENSG00000203546 | RP11-176H8.1  | -1.375 | 0.0091 |
| ENSG00000254911 | SCARNA9       | -1.807 | 0.009  |
| ENSG00000161180 | CCDC116       | -2.333 | 0.009  |
| ENSG00000215283 | HMGB3P24      | -1.095 | 0.0087 |
| ENSG00000100138 | SNU13         | -1.109 | 0.0083 |
| ENSG00000127578 | WFIKKN1       | -1.434 | 0.0082 |
| ENSG00000253404 | AC034243.1    | -1.29  | 0.0082 |
| ENSG00000250326 | RP11-284M14.1 | -2.263 | 0.0082 |
| ENSG00000125046 | SSUH2         | -1.436 | 0.0081 |
| ENSG00000278202 | RP11-152F13.8 | -1.396 | 0.0081 |
| ENSG00000135702 | CHST5         | -2.28  | 0.0077 |
| ENSG00000259845 | HERC2P10      | -2.879 | 0.0075 |
| ENSG00000271590 | RP11-181E10.3 | -1.357 | 0.0072 |
| ENSG00000261560 | RP11-166B2.3  | -1.114 | 0.0069 |
| ENSG00000229525 | AC053503.4    | -1.727 | 0.0067 |
| ENSG00000276259 | RP11-481J2.4  | -1.354 | 0.0066 |
| ENSG00000232177 | MTND4P24      | -2.354 | 0.0065 |
| ENSG00000130943 | PKDREJ        | -1.151 | 0.0063 |
| ENSG00000283245 | SCHIP1        | -1.72  | 0.0062 |
| ENSG00000266896 | RP1-266L20.9  | -1.434 | 0.0061 |
| ENSG00000278238 | RP11-245D16.4 | -1.035 | 0.006  |
| ENSG00000215417 | MIR17HG       | -1.031 | 0.0056 |
| ENSG00000220875 | HIST1H3PS1    | -2.785 | 0.0055 |
| ENSG00000137878 | GCOM1         | -1.333 | 0.0054 |
| ENSG00000272892 | RP11-57G10.8  | -1.679 | 0.0051 |
| ENSG00000162669 | HFM1          | -1.78  | 0.005  |
| ENSG00000263164 | RP11-333E1.2  | -2.958 | 0.0049 |
| ENSG00000224126 | UBE2SP2       | -1.116 | 0.0049 |
| ENSG00000256566 | RP4-734P14.4  | -2.359 | 0.0048 |
| ENSG00000271105 | SCML2P2       | -1.645 | 0.0048 |
| ENSG00000233230 | AC079807.2    | -1.041 | 0.0047 |
| ENSG00000006047 | YBX2          | -1.104 | 0.0047 |
| ENSG00000273007 | RP11-170N16.3 | -1.084 | 0.0045 |
| ENSG00000231154 | MORF4L2-AS1   | -1.104 | 0.0045 |
| ENSG00000261008 | LINC01572     | -1.159 | 0.0044 |
| ENSG00000167945 | PRR25         | -1.853 | 0.0042 |
| ENSG00000103184 | SEC14L5       | -1.419 | 0.0041 |
| ENSG00000273759 | RP4-563E14.1  | -1.024 | 0.004  |
| ENSG00000186453 | FAM228A       | -3.008 | 0.0039 |
| ENSG00000265185 | SNORD3B-1     | -1.448 | 0.0038 |
| ENSG00000230251 | PHBP4         | -3.01  | 0.0037 |

## CCL2-CCL5/CCR4 and radiation response

|                 |                  |        |        |
|-----------------|------------------|--------|--------|
| ENSG00000197561 | ELANE            | -1.295 | 0.0036 |
| ENSG00000267892 | CTD-2540F13.2    | -1.122 | 0.0035 |
| ENSG00000273473 | LLO9NC01-139C3.1 | -2.85  | 0.0034 |
| ENSG00000261159 | RP11-72304.9     | -1.052 | 0.0032 |
| ENSG00000230530 | LIMD1-AS1        | -3.014 | 0.0032 |
| ENSG00000269026 | AC003006.7       | -2.811 | 0.0031 |
| ENSG00000261215 | RP11-195F19.30   | -1.792 | 0.0031 |
| ENSG00000180481 | GLIPR1L2         | -1.433 | 0.003  |
| ENSG00000186907 | RTN4RL2          | -1.172 | 0.0029 |
| ENSG00000141449 | GREB1L           | -1.066 | 0.0027 |
| ENSG00000155189 | AGPAT5           | -1.37  | 0.0027 |
| ENSG00000166763 | STRCP1           | -2.884 | 0.0025 |
| ENSG00000251259 | AC004069.2       | -1.143 | 0.0025 |
| ENSG00000213062 | RP1-206D15.6     | -1.729 | 0.0024 |
| ENSG00000138398 | PPIG             | -1.233 | 0.0021 |
| ENSG00000226321 | CROCC2           | -2.936 | 0.0021 |
| ENSG00000167550 | RHEBL1           | -1.013 | 0.002  |
| ENSG00000011347 | SYT7             | -1.028 | 0.002  |
| ENSG00000222881 | Y_RNA            | -1.721 | 0.0019 |
| ENSG00000065361 | ERBB3            | -1.021 | 0.0017 |
| ENSG00000231256 | C17orf105        | -3.169 | 0.0017 |
| ENSG00000236194 | AC003104.1       | -2.228 | 0.0015 |
| ENSG00000234129 | RP11-120D5.1     | -1.217 | 0.0015 |
| ENSG00000227963 | RP5-1074L1.1     | -3.21  | 0.0014 |
| ENSG00000272734 | ADIRF-AS1        | -1.063 | 0.0014 |
| ENSG00000102385 | DRP2             | -1.012 | 0.0014 |
| ENSG00000171827 | ZNF570           | -1.37  | 0.0013 |
| ENSG00000241549 | GUSBP2           | -1.12  | 0.0013 |
| ENSG00000259790 | ANP32BP1         | -1.231 | 0.0011 |
| ENSG00000204623 | ZNRD1ASP         | -1.258 | 0.0009 |
| ENSG00000230667 | SETSIP           | -1.054 | 0.0009 |
| ENSG00000264743 | DPRXP4           | -1.659 | 0.0009 |
| ENSG00000250033 | SLC7A11-AS1      | -1.512 | 0.0008 |
| ENSG00000226833 | AC097724.3       | -1.248 | 0.0007 |
| ENSG00000272524 | RP11-254F7.4     | -2.085 | 0.0007 |
| ENSG00000277846 | SNORD30          | -1.307 | 0.0007 |
| ENSG00000273002 | RP11-336K24.12   | -1.01  | 0.0006 |
| ENSG00000225173 | XXbac-BPG308K3.5 | -3.185 | 0.0005 |
| ENSG00000213772 | EIF1P7           | -1.696 | 0.0005 |
| ENSG00000139354 | GAS2L3           | -1.241 | 0.0005 |
| ENSG00000271888 | RP11-560J1.2     | -1.255 | 0.0004 |
| ENSG00000150672 | DLG2             | -1.162 | 0.0004 |
| ENSG00000260924 | LINC01311        | -1.173 | 0.0004 |
| ENSG00000141314 | RHBDL3           | -1.003 | 0.0003 |
| ENSG00000105479 | CCDC114          | -1.64  | 0.0003 |
| ENSG00000167011 | NAT16            | -1.296 | 0.0002 |
| ENSG00000241749 | RPSAP52          | -1.059 | 0.0002 |
| ENSG00000156509 | FBX043           | -1.23  | 0.0002 |
| ENSG00000106336 | FBX024           | -1.324 | 0.0002 |

## CCL2-CCL5/CCR4 and radiation response

|                 |                    |        |          |
|-----------------|--------------------|--------|----------|
| ENSG00000024526 | DEPDC1             | -1.02  | 0.0001   |
| ENSG00000278743 | RP11-707G18.1      | -1.881 | 0.0001   |
| ENSG00000004838 | ZMYND10            | -1.792 | 0.0001   |
| ENSG00000222898 | RN7SKP97           | -1.439 | 7.74E-05 |
| ENSG00000272501 | XXbac-BPG299F13.17 | -1.015 | 7.47E-05 |
| ENSG00000164362 | TERT               | -1.582 | 7.36E-05 |
| ENSG00000274925 | CTD-2547G23.4      | -1.087 | 6.91E-05 |
| ENSG00000167525 | PROCA1             | -1.081 | 6.52E-05 |
| ENSG00000226416 | MRPL23-AS1         | -1.136 | 6.13E-05 |
| ENSG00000228218 | ATF4P3             | -1.128 | 5.93E-05 |
| ENSG00000181544 | FANCB              | -1.147 | 4.88E-05 |
| ENSG00000197587 | DMBX1              | -1.052 | 4.13E-05 |
| ENSG00000225872 | LINC01529          | -1.277 | 3.60E-05 |
| ENSG00000143882 | ATP6V1C2           | -1.128 | 3.56E-05 |
| ENSG00000214776 | RP11-726G1.1       | -1.279 | 2.48E-05 |
| ENSG00000276672 | RP11-142E9.1       | -1.236 | 1.39E-05 |
| ENSG00000267698 | AC002116.7         | -1.014 | 7.08E-06 |
| ENSG00000224934 | RP11-441015.3      | -1.111 | 6.54E-06 |
| ENSG00000258984 | UBE2F-SCLY         | -3.651 | 6.08E-06 |
| ENSG00000066279 | ASPM               | -1.565 | 3.48E-06 |
| ENSG00000230002 | ALMS1-IT1          | -1.147 | 1.84E-06 |
| ENSG00000233589 | RP4-694A7.2        | -1.893 | 1.79E-06 |
| ENSG00000126500 | FLRT1              | -1.244 | 1.33E-06 |
| ENSG00000257167 | TMPO-AS1           | -1.075 | 8.47E-07 |
| ENSG00000133739 | LRRCC1             | -1.021 | 7.53E-07 |
| ENSG00000176244 | ACBD7              | -1.518 | 7.09E-07 |
| ENSG00000138587 | MNS1               | -1.019 | 5.06E-07 |
| ENSG00000198417 | MT1F               | -1.585 | 3.78E-07 |
| ENSG00000148773 | MKI67              | -1.459 | 1.75E-07 |
| ENSG00000215158 | RP11-1023L17.1     | -1.297 | 1.33E-07 |
| ENSG00000103995 | CEP152             | -1.071 | 6.13E-08 |
| ENSG00000122483 | CCDC18             | -1.15  | 4.29E-08 |
| ENSG00000166762 | CATSPER2           | -1.503 | 3.64E-08 |
| ENSG00000111981 | ULBP1              | -1.152 | 3.64E-08 |
| ENSG00000255152 | MSH5-SAPCD1        | -1.142 | 1.60E-08 |
| ENSG00000100206 | DMC1               | -1.077 | 1.42E-08 |
| ENSG00000128965 | CHAC1              | -1.562 | 1.40E-08 |
| ENSG00000188610 | FAM72B             | -1.158 | 9.17E-09 |
| ENSG00000163009 | C2orf48            | -1.719 | 6.38E-09 |
| ENSG00000235823 | OLMALINC           | -1.022 | 1.46E-09 |
| ENSG00000265415 | CTD-2510F5.4       | -1.053 | 5.04E-10 |
| ENSG00000174799 | CEP135             | -1.103 | 1.63E-10 |
| ENSG00000111247 | RAD51AP1           | -1.144 | 1.10E-10 |
| ENSG00000228727 | SAPCD1             | -1.768 | 8.73E-11 |
| ENSG00000264207 | RP11-196G18.23     | -1.346 | 5.50E-11 |
| ENSG00000129007 | CALML4             | -1.196 | 3.86E-11 |
| ENSG00000196415 | PRTN3              | -2.674 | 1.95E-11 |
| ENSG00000205362 | MT1A               | -1.011 | 1.03E-11 |
| ENSG00000267374 | RP11-244M2.1       | -1.71  | 7.47E-12 |

## CCL2-CCL5/CCR4 and radiation response

|                 |          |        |          |
|-----------------|----------|--------|----------|
| ENSG00000166845 | C18orf54 | -1.46  | 1.06E-13 |
| ENSG00000176225 | RTTN     | -1.004 | 6.10E-14 |
| ENSG00000154920 | EME1     | -1.054 | 4.46E-14 |
| ENSG00000121211 | MND1     | -1.304 | 2.46E-14 |
| ENSG00000158402 | CDC25C   | -1.16  | 7.91E-15 |
| ENSG00000006634 | DBF4     | -1.009 | 2.74E-15 |
| ENSG00000238227 | C9orf69  | -1.742 | 1.32E-17 |
| ENSG00000136108 | CKAP2    | -1.121 | 1.69E-18 |
| ENSG00000140451 | PIF1     | -1.212 | 1.20E-18 |
| ENSG00000102384 | CENPI    | -1.053 | 6.47E-19 |
| ENSG00000142731 | PLK4     | -1.108 | 1.45E-19 |
| ENSG00000112029 | FBX05    | -1.003 | 4.84E-20 |
| ENSG00000121621 | KIF18A   | -1.187 | 7.20E-21 |
| ENSG00000129173 | E2F8     | -1.485 | 1.54E-21 |
| ENSG00000167131 | CCDC103  | -2.16  | 4.21E-22 |
| ENSG00000113810 | SMC4     | -1.066 | 9.80E-23 |
| ENSG00000178999 | AURKB    | -1.158 | 8.98E-23 |
| ENSG00000129534 | MIS18BP1 | -1.015 | 6.15E-23 |
| ENSG00000164611 | PTTG1    | -1.091 | 2.11E-23 |
| ENSG00000196550 | FAM72A   | -1.128 | 1.37E-23 |
| ENSG00000080986 | NDC80    | -1.027 | 2.56E-24 |
| ENSG00000164118 | CEP44    | -1.397 | 1.73E-24 |
| ENSG00000119397 | CNTRL    | -1.074 | 1.59E-24 |
| ENSG00000153044 | CENPH    | -1.148 | 9.72E-25 |
| ENSG00000184445 | KNTC1    | -1.174 | 8.75E-25 |
| ENSG00000137804 | NUSAP1   | -1.078 | 4.19E-25 |
| ENSG00000115163 | CENPA    | -1.119 | 3.70E-25 |
| ENSG00000176208 | ATAD5    | -1.534 | 6.90E-26 |
| ENSG00000213390 | ARHGAP19 | -1.036 | 2.96E-26 |
| ENSG00000164104 | HMGB2    | -1.067 | 2.70E-26 |
| ENSG00000144554 | FANCD2   | -1.213 | 8.06E-27 |
| ENSG00000004777 | ARHGAP33 | -1.263 | 3.97E-27 |
| ENSG00000112742 | TTK      | -1.153 | 3.78E-27 |
| ENSG00000118193 | KIF14    | -1.475 | 1.35E-27 |
| ENSG00000137812 | KNL1     | -1.24  | 5.46E-28 |
| ENSG00000122966 | CIT      | -1.098 | 4.80E-29 |
| ENSG00000138778 | CENPE    | -1.811 | 4.63E-29 |
| ENSG00000068489 | PRR11    | -1.033 | 3.73E-30 |
| ENSG00000138182 | KIF20B   | -1.26  | 6.17E-31 |
| ENSG00000186185 | KIF18B   | -1.031 | 5.93E-31 |
| ENSG00000169607 | CKAP2L   | -1.036 | 3.26E-31 |
| ENSG00000237649 | KIFC1    | -1.003 | 1.26E-31 |
| ENSG00000163535 | SGO2     | -1.274 | 3.03E-32 |
| ENSG00000163808 | KIF15    | -1.322 | 1.40E-32 |
| ENSG00000109674 | NEIL3    | -1.019 | 1.07E-32 |
| ENSG00000142945 | KIF2C    | -1.113 | 4.94E-36 |
| ENSG00000076382 | SPAG5    | -1.034 | 4.67E-37 |
| ENSG00000114346 | ECT2     | -1.048 | 1.03E-37 |
| ENSG00000011426 | ANLN     | -1.003 | 9.56E-38 |

## CCL2-CCL5/CCR4 and radiation response

|                 |               |        |           |
|-----------------|---------------|--------|-----------|
| ENSG00000145386 | CCNA2         | -1.03  | 6.11E-38  |
| ENSG00000138160 | KIF11         | -1.048 | 7.84E-41  |
| ENSG00000185480 | PARPBP        | -1.469 | 7.64E-41  |
| ENSG00000143228 | NUF2          | -1.182 | 6.20E-42  |
| ENSG00000117724 | CENPF         | -1.564 | 6.19E-47  |
| ENSG00000131747 | TOP2A         | -1.051 | 3.73E-51  |
| ENSG00000238266 | LINC00707     | -1.138 | 3.08E-53  |
| ENSG00000072571 | HMMR          | -1.064 | 2.04E-53  |
| ENSG00000169679 | BUB1          | -1.139 | 2.22E-56  |
| ENSG00000126787 | DLGAP5        | -1.155 | 9.54E-57  |
| ENSG00000112984 | KIF20A        | -1.156 | 1.07E-57  |
| ENSG00000215784 | FAM72D        | -1.482 | 5.57E-61  |
| ENSG00000117650 | NEK2          | -1.277 | 1.07E-68  |
| ENSG00000263513 | FAM72C        | -1.5   | 5.31E-69  |
| ENSG00000169756 | LIMS1         | -1.855 | 3.06E-106 |
| ENSG00000260772 | RP11-311C24.1 | -8.337 | 3.01E-119 |
| ENSG00000126945 | HNRNP2        | -5.976 | 0         |

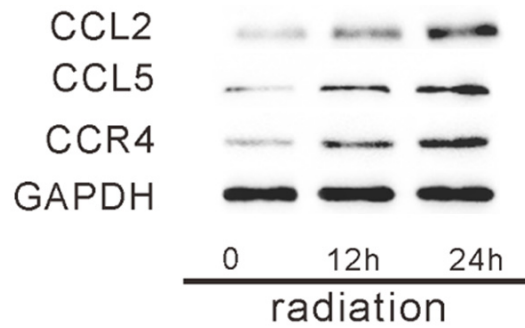

**Supplementary Figure 1.** Original western blot data of Figure 3B.

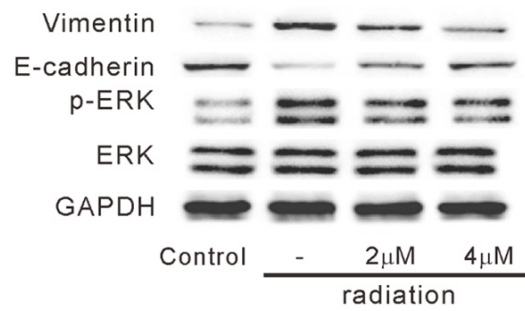

**Supplementary Figure 2.** Original western blot data of Figure 4B.

## CCL2-CCL5/CCR4 and radiation response

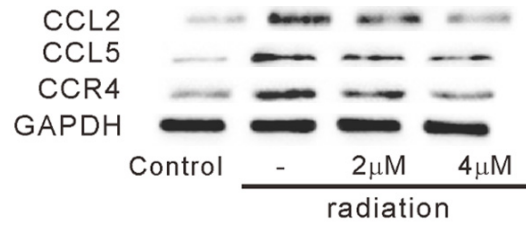

Supplementary Figure 3. Original western blot data of Figure 5B.

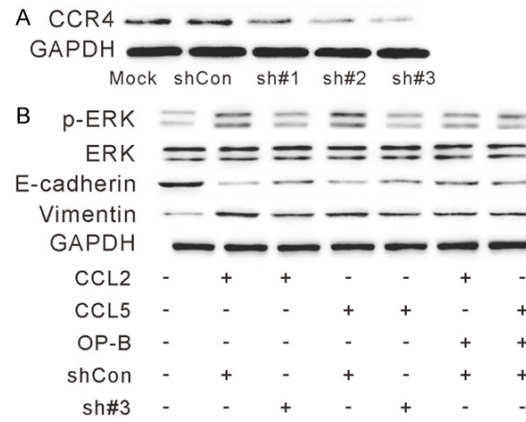

Supplementary Figure 4. Original western blot data of Figure 6B (A) and 6C (B).

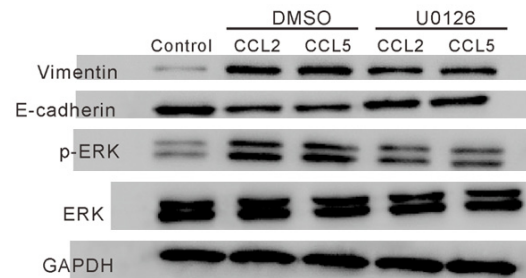

Supplementary Figure 5. Original western blot data of Figure 7B.
